# 1 **A virtual host model of *Mycobacterium tuberculosis* infection identifies early immune events** 2 **as predictive of infection outcomes**

3  
4 Louis R. Joslyn<sup>1,2</sup>, Jennifer J. Linderman<sup>2\*</sup>, Denise E. Kirschner<sup>1\*</sup>

5  
6 <sup>1</sup>Department of Microbiology and Immunology, University of Michigan Medical School, 1150  
7 W Medical Center Drive, 5641 Medical Science II, Ann Arbor, MI 48109-5620

8 <sup>2</sup>Department of Chemical Engineering, University of Michigan, G045W NCRC B28, 2800  
9 Plymouth Rd, Ann Arbor, MI 48109-2136

10  
11 \* Corresponding Authors:

12 Denise E. Kirschner, Department of Microbiology and Immunology, University of Michigan  
13 Medical School, 1150 W Medical Center Drive, 5641 Medical Science II, Ann Arbor, MI 48109-  
14 5620, [kirschne@umich.edu](mailto:kirschne@umich.edu)

15 Jennifer J. Linderman, University of Michigan Department of Chemical Engineering, NCRC  
16 B28, 2800 Plymouth Rd, Ann Arbor, MI 48109, [linderman@umich.edu](mailto:linderman@umich.edu)

## 17 18 **Abstract**

19  
20 Tuberculosis (TB), caused by infection with *Mycobacterium tuberculosis* (Mtb), is one of the  
21 world's deadliest infectious diseases and remains a significant global health burden. TB disease  
22 and pathology can present clinically across a spectrum of outcomes, ranging from total  
23 sterilization of infection to active disease. Much remains unknown about the biology that drives  
24 an individual towards various clinical outcomes as it is challenging to experimentally address  
25 specific mechanisms driving clinical outcomes. Furthermore, it is unknown whether numbers of  
26 immune cells in the blood accurately reflect ongoing events during infection within human lungs.  
27 Herein, we utilize a systems biology approach by developing a whole-host model of the immune  
28 response to Mtb across multiple physiologic and time scales. This model, called *HostSim*, tracks  
29 events at the cellular, granuloma, organ, and host scale and represents the first whole-host, multi-  
30 scale model of the immune response following Mtb infection. We show that this model can  
31 capture various aspects of human and non-human primate TB disease and predict that  
32 biomarkers in the blood may only faithfully represent events in the lung at early time points after  
33 infection. We posit that *HostSim*, as a first step toward personalized digital twins in TB research,  
34 offers a powerful computational tool that can be used in concert with experimental approaches to  
35 understand and predict events about various aspects of TB disease and therapeutics.

## 36 37 **Keywords**

38 Multi-scale Modeling, Tuberculosis, T cells, Digital Twins, Systems Biology, Mechanistic  
39 Modeling

## 40 41 **Introduction**

42  
43 Even during the COVID-19 pandemic, tuberculosis (TB) continues to be a global threat.  
44 Approximately 25% of the world is infected with *Mycobacterium tuberculosis* (Mtb) and 5-10%  
45 of those currently infected will progress to develop symptomatic clinical disease (1). TB patients  
46 are often classified as having latent tuberculosis (LTBI) or active TB. LTBI is an asymptomatic

47 state of infection with typically low levels of Mtb present. Active TB cases exhibit clinical  
48 symptoms including fever, weight loss, night sweats, and coughing typically with high levels of  
49 Mtb present. While patients are categorized within these binary states, recent work has shown  
50 that TB manifests as a spectrum of clinical and infection outcomes within humans and non-  
51 human primates (NHPs) (2–5). LTBI individuals can undergo reactivation events and therefore  
52 act as a potential reservoir for disease transmission (6,7). Much remains unknown about the  
53 biology that drives clinical outcomes in TB (i.e., latent or active) for each individual patient. It is  
54 critical to understand events that lead to latent or active TB in order to develop effective vaccines  
55 and host-directed therapies.

56  
57 The hallmark of TB is the formation of lung granulomas, which are organized immune structures  
58 that surround Mtb and Mtb-infected cells within lungs of infected hosts (8). NHP data have  
59 shown that a single mycobacterium is sufficient to begin the formation of a granuloma and that  
60 each granuloma has a unique trajectory (9,10). Granulomas are composed of bacteria and  
61 various immune cells, such as macrophages and T cells (primarily CD4+ and CD8+ T cells,  
62 although other unconventional T cell phenotypes are also present, reviewed in (11)). Other cells  
63 such as neutrophils, fibroblasts and dendritic cells are also present. T cells have well-known  
64 critical functions against Mtb (12–14), but unlike other infections, T cells are slow to enter the  
65 site of infection within lungs, arriving approximately one month after primary infection (15).  
66 Lung-draining lymph nodes (LN) serve as sites for initiating and generating an adaptive immune  
67 response against most pulmonary infections, including Mtb. However, delays in LN T-cell  
68 priming, activation, and trafficking through blood to lungs is characteristic of the adaptive  
69 immune response in Mtb (16,17) and is thought to be key in allowing Mtb to establish infection  
70 within lungs (15). The delay is thought to arise from slowly growing mycobacteria in the lungs,  
71 delaying the signals for adaptive immunity (18).

72  
73 While studies at the granuloma scale have elucidated important features about how individual  
74 granulomas control infection, it is difficult to experimentally identify immune mechanisms  
75 within lung granulomas and LNs that drive clinical outcomes of TB at a whole-host scale.  
76 Mediators such as CD4+ T cells, CD8+ T cells and TNF $\alpha$  are important in controlling  
77 established Mtb infection (12,19,20). NHP studies have shown that active TB individuals harbor  
78 significantly more bacteria than LTBI individuals (21) but these studies have been unable to  
79 relate individual granuloma outcomes to whole-host clinical outcomes, in part because the fate of  
80 individual granulomas vary within a single host (9).

81  
82 Data from sites of infection (lung granulomas) in humans are generally unavailable.  
83 Consequently, it is not known whether numbers of immune cells in the blood reflect ongoing  
84 events during infection within human lungs (22). This has limited the ability to use blood as a  
85 predictive measure for infection progression or diagnosis. However, recent association studies  
86 suggest ratios of antigen-specific CD4+ and CD8+ T cells within the blood of Mtb-infected hosts  
87 may help delineate LTBI from active TB (23,24). Conversely, NHP studies have shown that T-  
88 cell responses in the blood do not consistently reflect T-cell responses in granulomas (25,26).

89  
90 Mathematical and computational modeling offer complementary approaches to experimental  
91 studies. Models have the power to simultaneously track multiple immune cell populations across  
92 multiple compartments, explore mechanisms of action related to immunological phenomenon,

93 and predict timing of major immune events. In TB (27), modeling has been used to explore  
94 bacterial behavior in relation to the granuloma environment (28), drug-dynamics within  
95 granulomas (29,30) and immune cell interactions and cytokines within a lung model (31–34).  
96 Additionally, pseudo whole-host models have been developed to begin to investigate biomarkers  
97 in TB (26) and drug dynamics across a host (35). Mathematical and computational modeling is a  
98 unique tool that could serve to bridge events occurring within a host to whole-host level TB  
99 outcomes (i.e. LTBI vs active TB).

100

101 Here we develop a novel whole-host scale modeling framework that captures key elements of the  
102 immune response to Mtb within three physiological compartments - LNs, blood and lungs of  
103 infected individuals. Beginning with our whole lung framework originally called *MultiGran*,  
104 each granuloma is formulated as an individual ‘agent’ in an agent-based model that contains a  
105 sub-model tracking immune cells, cytokines, and bacterial populations for each granuloma (36).  
106 We extend this framework to capture dynamics of a whole host by linking it with a two-  
107 compartment model representing immune cell dynamics occurring within LNs and blood  
108 (37,38). Together, this new model platform, called *HostSim*, represents a whole-host framework  
109 for tracking Mtb infection dynamics within a single host across long time scales (days to months  
110 to years). We calibrate and validate the model using multiple datasets from published NHP  
111 studies.

112

113 Once developed, we use *HostSim* to answer two outstanding questions surrounding whole-host  
114 outcomes in TB: 1) what are mechanisms within a host that drive clinical outcomes in TB at the  
115 whole-host scale? 2) is there a relationship between blood immune cell counts and clinical  
116 outcomes at the whole-host scale? We use *HostSim*, the first whole host multi-scale model of  
117 Mtb infection, to relate immune responses in the blood to the sites of infection within lungs.  
118 Additionally, we utilize sensitivity analysis to predict factors that lead to clinical outcomes of  
119 TB.

120

## 121 **Methods**

122

### 123 *HostSim* model overview

124

125 Our novel multi-scale whole-host scale model, *HostSim*, tracks Mtb infection across three  
126 separate physiological compartments (Figure 1). We describe the formation, function and  
127 dissemination of multiple granulomas that represent distinct sites of infection developing within  
128 a whole-lung model. We additionally describe the initiation of adaptive immunity within a LN  
129 compartment after receiving signals from antigen presenting cells migrating from lungs. Finally,  
130 we track immune cell counts within a blood compartment that acts as a bridge between LN to  
131 lungs. *HostSim* uses rule-based agent placement, employs parameter randomization, solves non-  
132 linear systems of ordinary differential equations (ODEs), performs post-processing agent  
133 groupings, and utilizes rule-based linking between scales to perform *in silico* simulations of a  
134 single host.

135

136 Our model is called *HostSim* as we consider a simulation of an entire primate host during Mtb  
137 infection; however, our *in silico* “hosts” are comprised solely of lungs, LN and blood. These  
138 three physiological compartments comprise the majority of dynamics that occur during

139 pulmonary TB (39,40). Other organs and body system are also involved during extrapulmonary  
140 TB, including liver, brain, and other extrapulmonary sites. We believe that focusing this study on  
141 pulmonary TB is without loss of generality, and that adding in those other body sites would serve  
142 to fine tune our predictions to other clinical outcomes of TB.

143  
144 Each virtual host includes multiple granulomas with separate parameter values, and a single  
145 parameter set for the LN and blood. The assumption that granulomas within the same host have  
146 separate parameter values is supported broadly by both modeling and experimental studies that  
147 have shown each granuloma within a host evolves independently (9,10,25,26,29,36,41,42).

148  
149 *Modeling multiple lung granulomas across time - MultiGran*

150  
151 In a recent study, we built a novel hybrid agent-based model that describes the development of  
152 multiple lung granulomas known as *MultiGran* (36). In this model, each granuloma acts as an  
153 agent, placed stochastically within the boundary of a 3-dimensional lung environment (Figure  
154 1A). To create this ‘virtual lung’ we used a CT scan from an uninfected NHP (36) as the three-  
155 dimensional lung architecture upon which multiple granulomas develop across time (translating  
156 the  $x,y,z$  coordinates from a CT scan to our computer model (36)). Simulations begin with  
157 inoculation of multiple bacteria into the lung environment. A granuloma is initialized when each  
158 Mtb is placed within the lung environment, as NHP studies have shown that each Mtb bacterium  
159 can form a unique granuloma (9,10).

160  
161 Briefly, the development of each individual granuloma “agent” is captured by a system of ODEs  
162 that tracks bacterial, macrophage, T cell, and cytokine dynamics. To describe the role of the  
163 innate immune response within a granuloma, we track resting, infected and activated  
164 macrophages as well intracellular and extracellular bacterial populations. To capture the impact  
165 of the adaptive immune system, we track primed CD4+ and CD8+ T cell populations. Primed  
166 CD4+ T cells can differentiate into effector Th1 or Th2 populations and primed CD8+ T cell  
167 populations can differentiate into cytotoxic or cytokine producing CD8+ T cell populations.  
168 Recruitment of T cells from the blood compartment to granulomas is described in greater detail  
169 below. We additionally track concentrations of pro- and anti- inflammatory cytokines within  
170 each granuloma, including IFN- $\gamma$ , TNF- $\alpha$ , IL-10, IL-4 and IL-12. *MultiGran* only included the  
171 primed and differentiated T cell populations described above; but we now include effector  
172 memory T cells to be consistent with experiments that have shown effector memory T cells are  
173 present within the granuloma environment (43–45). Thus, we expanded the set of ODEs  
174 representing each single granuloma in *MultiGran* (36) to include CD4+ and CD8+ effector  
175 memory T cell subpopulations. Briefly, we assume effector memory cells are recruited from the  
176 blood to granulomas according to the inflammatory profiles of granulomas (see Linking models  
177 section below for further detail). Once at the site of the granuloma, effector memory cells  
178 differentiate into T cells that exhibit effector functions (45–47).

179  
180 Granulomas within *MultiGran* can sterilize bacteria, control bacterial growth over time, or  
181 exhibit uncontrolled bacterial growth. Granulomas can also disseminate, spreading bacteria  
182 locally or non-locally (Figure 1A). Local dissemination events initialize a new granuloma near  
183 the disseminating granuloma whereas non-local dissemination initializes a new granuloma

184 randomly within the lung environment. Model equations and details are in the Supplementary  
185 Materials, which includes a list of all parameters, definitions, and ranges.

186

### 187 *Lymph node and blood models*

188

189 In previous work, we captured LN and blood cellular dynamics following Mtb infection or  
190 vaccination using a two-compartment mathematical model (26,38,48). Briefly, we track Mtb-  
191 specific and Mtb-non-specific CD4<sup>+</sup> and CD8<sup>+</sup> naïve, effector, effector memory, and central  
192 memory T cell responses using a compartmentalized system of 31 non-linear ODEs (Figure 1B).  
193 We represent Mtb-specific T cells as a generic class of antigen-specific cells across time. In the  
194 LN, T cells are tracked as counts across time, whereas in the blood, the cells are tracked as a  
195 concentration (cells/ $\mu$ L) because experimental data on blood T cells is often presented as a  
196 concentration. Supplementary Materials gives the list of all parameters, definitions, and ranges  
197 for the blood and LN models.

198

### 199 *Creating the multi-scale model: Linking the lung model (MultiGran) and the lymph node model*

200

201 T-cell priming, proliferation and differentiation begins in the LN when an antigen-presenting cell  
202 (APC) travels from lungs to LN and interacts with a Mtb-specific T cells. In mice, this process  
203 does not begin until 9-13 days after inoculation (16,40), but serial positron emission tomography  
204 coupled with computed tomography scans (PET-CT) in NHP studies have shown that LNs do not  
205 become metabolically active until 2-4 weeks post-infection (39,49,50). Wolf et al. showed that  
206 the migration of cells to LN is transient (40), and NHP PET-CT studies revealed that LNs do not  
207 increase metabolic activity following 8-12 weeks post-infection during latent infection (49).

208

209 We mirror this biological phenomenon in a coarse-grained manner within *HostSim* (Figure 2C).  
210 As infection progresses within *HostSim*, we allow infected macrophages within granulomas to  
211 act as a proxy for APCs that migrate to the LN beginning ~1-4 weeks post-infection. This  
212 assumption is supported by experimental studies and previous modeling has made similar  
213 assumptions (36,51,52). We represent the percentage (5-25%) of infected macrophages which  
214 will act as APCs and migrate to the lymph node as a parameter that can be varied. This range  
215 emerged from calibration, but it is validated by experiments that show only a small fraction of  
216 cells can traffic to the LN (51–53). The main migration of immune cells to LNs ceases ~7-14  
217 weeks post-infection, consistent with the NHP PET-CT data (49). However, as TB is a chronic  
218 disease, we include stochastic events where a small percentage of cells randomly migrate to the  
219 LN every few days. All processes that link lung and LN compartments are events guided by  
220 parameters whose initial ranges were estimated from both mouse (16,40) and NHP data  
221 (39,49,50). For example, even though we model a single LN compartment, approximately five  
222 LNs are involved in NHP and human Mtb infection (50), so we scale all LN T cell counts by a  
223 multiple of five when they enter the blood compartment, as done previously (26,37,38).

224

### 225 *Creating the multi-scale model: Linking the blood model to the lung model (MultiGran)*

226

227 We also coarse-grain the process of T-cell lung-homing and migration to the sites of granulomas.  
228 In *HostSim*, there are three types of blood T cells that are recruited to the granuloma: Mtb-  
229 specific effector T cells, Mtb-specific effector memory T cells, and non-specific T-cells. Note,

230 once blood Mtb-specific effector T cells arrive in the granuloma, they are considered primed T  
231 cells. Recruitment occurs for both CD4+ and CD8+ T cell lineages.

232  
233 Each cell type is recruited to each granuloma according to inflammatory signals within our  
234 granuloma model. These include counts of activated and infected macrophages, and levels of the  
235 pro-inflammatory cytokine TNF, consistent with experimental data and previously presented  
236 models (25,37,54–57). We calculate the number of Mtb-specific effector T cells that will be  
237 recruited from the blood to the  $i^{th}$  granuloma,  $granuloma_i$ , per time step according to the  
238 following equation, as outlined in our previous modeling work (33,36,58):

$$\begin{aligned} 239 & \\ 240 & \text{granuloma}_i \text{Recruit} \\ 241 & = \alpha_{1a}(\text{granuloma}_i M_A + w_2 \text{granuloma}_i M_I) \\ 242 & + Sr_{1b} \left( \frac{\text{granuloma}_i TNF_\alpha}{\text{granuloma}_i TNF_\alpha + f_8 \text{granuloma}_i IL_{10} + s_{4b2}} \right) \end{aligned}$$

243  
244  
245 Where  $\alpha_{1a}$ ,  $w_2$ ,  $Sr_{1b}$ ,  $f_8$ ,  $s_{4b2}$  are granuloma-specific parameters (see Supplementary Material  
246 Table 1). Effector Memory T cells are recruited similarly to each granuloma, but recruitment is  
247 performed proportional to the level of TNF- $\alpha$  within the granuloma (see Effector Memory T cell  
248 granuloma equations in Supplementary Material). We assume different mechanisms of  
249 recruitment between these T cell phenotypes arises due to known differences in migration of  
250 effector memory and effector T cells to non-lymphoid sites, such as the lung (reviewed in (58)).  
251 Altogether, numbers of macrophage and inflammatory cytokine levels act as a proxy within our  
252 model for chemotactic and adhesion molecules acting within a granuloma that attract T cells to  
253 the site. We perform recruitment for each granuloma at every timestep within the model, i.e.  
254 once per 24 hours. At each timestep we update the blood cell numbers by subtracting the  
255 summed granuloma recruitment for each cell type, according to the following general form:

$$256 \\ 257 \text{BloodCell} = \text{BloodConcentration} * V_{\text{blood}} \\ 258$$

$$259 \text{BloodCell} = \text{BloodCell} - \sum_{i=1}^{n=\text{number of granulomas}} \text{granuloma}_i \text{Recruit}$$

260  
261  
262 where blood cell concentrations (cells/ $\mu\text{L}$ ) are converted to blood cell numbers prior to entering  
263 the granulomas.  $V_{\text{blood}}$  is equal to  $3.6 \times 10^5 \mu\text{L}$ , a well-established value in the literature that  
264 represents the volume of blood (26,37,38,60). This parameter is used to scale cells when they  
265 traffic between the blood and the lung or LN compartments. This type of volumetric scaling is  
266 standard in compartmental modeling (61).

267  
268 During very early timesteps following inoculation, granulomas may occasionally attempt to  
269 recruit more Mtb-specific T cells than are physically available within the blood compartment.  
270 Should this happen, recruitment cell counts are obtained by normalizing the corresponding blood  
271 concentrations, such that the magnitude of cell recruitment is proportional to the blood  
272 concentration. In general, our assumption that more inflammatory granulomas are able to

273 recruit larger quantities of T cells is consistent with previously presented models and  
 274 experimental data (25,26,33,42,54).  
 275

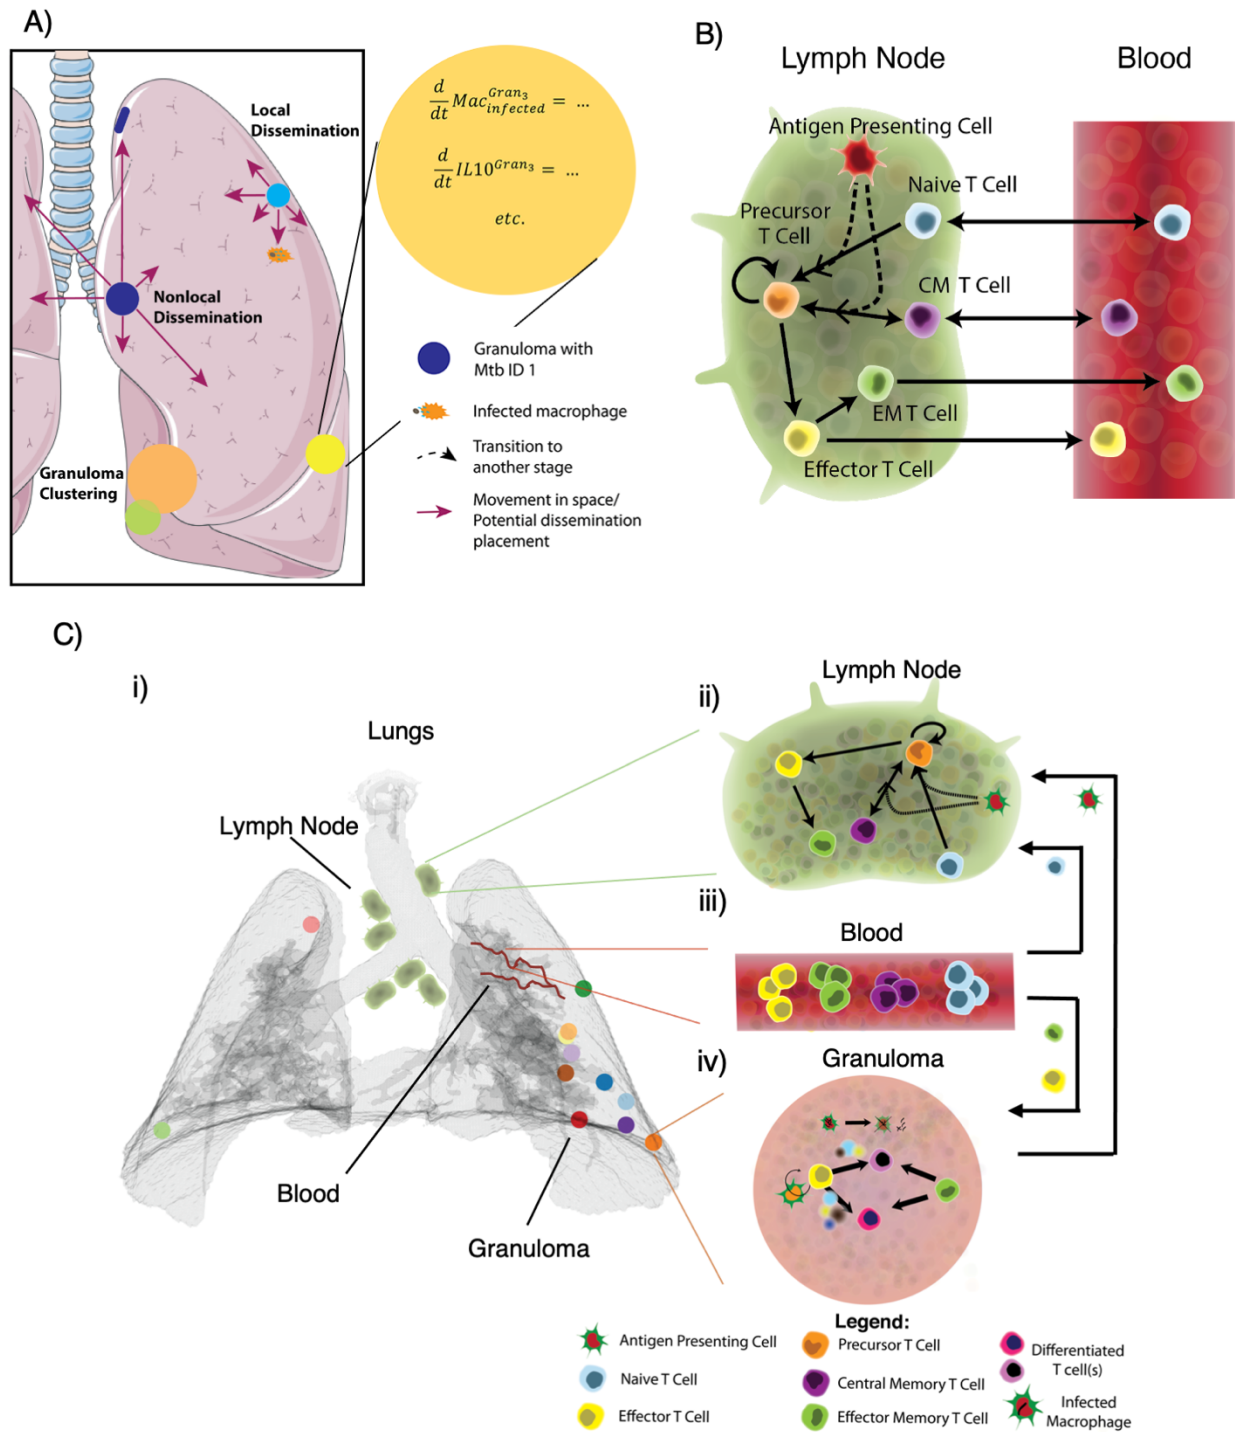

276  
 277

278 **Figure 1: HostSim multi-scale modeling framework.** (A) Multiple lung granuloma (*MultiGran*)  
279 model conceptual framework. Adapted from Figure 2 in (36). B) The blood and lymph node  
280 (LN) model that tracks multiple T cell phenotypes across LN and blood compartments. Adapted  
281 from Figure 2 in (38). C) i) *HostSim* model schematic showing lungs (gray), separate granulomas  
282 (various colored circles), lung draining lymph nodes (green near trachea), and conceptual lung  
283 vasculature (red curves). (ii) Antigen presenting cells travel from lung granulomas to lymph  
284 nodes to initiate T cell priming, proliferation, and differentiation. T cells travel from lymph  
285 nodes into (iii) blood and re-enter lung granuloma environments (iv) continuously over time to  
286 participate in bacterial killing and containment within the granuloma.

287

288

289 *Calibrating HostSim to multiple datasets*

290

291 After construction of *HostSim*, we calibrated the model to estimate model parameter values. An  
292 effective strategy to calibrate a complex, multi-scale and multi-compartment system is to  
293 calibrate to multiple datasets, thereby reducing the likelihood of parameter overfitting (62). We  
294 utilized our previously published protocol for calibrating complex systems to biological data,  
295 *CaliPro* (63), to generate a range of calibrated parameter values.

296

297 Using *CaliPro*, we simultaneously calibrated to biological datasets across multiple biological  
298 scales. We calibrated the single granuloma ODE model to previously published T cell and  
299 macrophage datasets from 28 NHP granulomas across 70 days and a bacterial CFU dataset for  
300 623 granulomas from 38 NHPs across 120 days (25,26,64,65). At the whole-host scale, we  
301 calibrated the lymph node and blood compartment to a previously published T cell dataset from  
302 26 NHPs across 200 days (26). Each time point within these data sets includes multiple data  
303 points, such that the experimental data illustrates a heterogenous range of potential outcomes  
304 (Figure 2 B, C & D).

305

306 We determined initial parameter ranges for each model parameter based on experimental values  
307 from literature, as well as previous single granuloma ODE models, previous lymph node and  
308 blood ODE models, and our previous work in modeling multiple granulomas (33,38,58,66). In  
309 this modeling framework, some of the parameter values are constrained (such as rates of  
310 bacterial killing or cellular death rates) and were not as widely varied as others. We utilized a  
311 Latin hypercube sampling (LHS) scheme to sample 500 times within the initial parameter space,  
312 thereby creating 500 unique simulations of *HostSim* (i.e. generating 500 unique virtual hosts).  
313 We then use *CaliPro* to refine and resample this wide initial parameter space in an iterative  
314 manner.

315

316 *CaliPro* requires users to explicitly define a *pass set* – this is an automated criterion for which  
317 the model simulations can be considered calibrated. We specify a pass set as the simulations that  
318 fall within the range bounded by an order of magnitude on either side of the minimum and  
319 maximum experimental data point for every time point across each of the experimental  
320 outcomes. The experimental data range includes over four orders of magnitude (Figure 2B),  
321 therefore our pass set definition was selected since it encapsulates the general behavior of the  
322 experimental datasets we are using for calibration and will not remove simulations that are  
323 within the same order of magnitude as experimental data points. Additionally, we know that the



324 long-term behavior of bacterial numbers in granulomas are fairly stable without intervention (9),  
325 and thus we set an upper bound at 36000 bacteria for days 90-200 as a specific criterion for  
326 calibration of this outcome. If the simulation value for bacterial numbers eclipse this bound  
327 within those days, the simulation does not belong to the pass set, even if the granuloma T cells  
328 and macrophages all lie within the bounds of the experimental data. In an iterative manner,  
329 *CaliPro* redefines the parameter ranges for each parameter according to the pass set simulations  
330 and reruns the model, comparing against the experimental data until calibration is considered  
331 complete (a pre-defined user input). For *HostSim*, calibration was considered complete when  
332 90% of simulations belonged to the pass set. Supplementary Material Table 1 lists the calibrated  
333 parameter ranges for each varied parameter.

334

### 335 *Sampling parameter space to create HostSim virtual hosts*

336

337 We sample from our calibrated parameter space to create each unique *HostSim* virtual host. Each  
338 host is composed of one parameter set that guides the LN and blood ODE model and one unique  
339 parameter set for each granuloma within the virtual host. When we generate a population of  
340 virtual hosts, we sample uniformly from our parameter space for the LN and blood model  
341 according to an LHS scheme (67) and select a single parameter set for each host. When sampling  
342 the granuloma ODE parameter space, we again utilize an LHS scheme to select an initial point in  
343 parameter space for each host, and then sample each granuloma parameter set for that host from  
344 a normal distribution. For each parameter, the mean of the normal distribution is set as initial  
345 point in parameter space as selected by LHS and  $\sigma$  is set to be equal to one-quarter of the  
346 parameter's calibrated range. We sample the granuloma parameter space once for every  
347 granuloma that is initialized within an individual at the time of inoculation (this number varies  
348 depending on the inoculation dose used in the virtual experiment). Together, the granuloma  
349 parameter set and the LN and blood parameter set are the inputs for a single virtual host  
350 simulation.

351

### 352 *Using bacterial numbers as a proxy for clinical classifications in HostSim*

353

354 To explore the range of possible host-scale outcomes in *HostSim*, we sample from our calibrated  
355 parameter space and generate a virtual population of 500 unique hosts. Each individual  
356 simulation begins with an inoculation dose of 10 CFU, stochastically placed within the lower left  
357 lung lobe to seed the formation of 10 unique granulomas. We start each simulation with 10 CFU  
358 to be consistent with the inoculation of NHPs, which inoculate ~10 CFU to begin experiments  
359 (68).

360

361 Each virtual host in the population is simulated for 200 days. At 200 days, we delineate clinical  
362 classifications across the population of 500 virtual hosts according to the total lung CFU per  
363 host. We calculate the total lung CFU by summing the individual granuloma CFU for all  
364 granulomas within a host at each time point. We use the following cutoffs for clinical  
365 classification: TB eliminators: total lung CFU < 1; Active TB cases: total lung CFU > 10<sup>5</sup>; LTBI:  
366 all other virtual hosts. We establish the threshold between active TB cases and LTBI cases in  
367 *HostSim* to be consistent with NHP studies that show that total bacterial burden in active TB  
368 cases is significantly higher than that of LTBI monkeys, although the same study did show a  
369 small number of active cases with a bacterial burden similar to that of latent NHPs (see

370 Discussion and (21) for more detail). Finally, we select 200 days (~7 months) post-infection for  
371 clinical classification in order to be consistent with NHP studies that classify animals 6-8 months  
372 following infection (69).

373

374 In the dose inoculation studies, we use the same virtual population of 500 hosts, but run 25  
375 separate virtual experiments and vary the inoculation dose from 1-25 CFU. Thus, depending on  
376 the study, hosts begin the simulation with 1 to 25 unique granulomas. At the conclusion of the  
377 simulation – day 200 – we use the same thresholds of total lung CFU for determining clinical  
378 classifications across all hosts.

379

### 380 *Uncertainty and Sensitivity Analysis*

381

382 We quantify the importance of host-scale and granuloma-scale mechanisms involved in infection  
383 outcomes using statistical techniques known as uncertainty and sensitivity analysis. As  
384 mentioned above, we efficiently sample our multi-dimensional calibrated parameter space using  
385 LHS algorithms to generate 500 individual virtual hosts. We then determine correlations between  
386 model outputs and parameter values by using Partial Rank Correlation Coefficient (PRCC), a  
387 common method for determining correlation-based sensitivity (67).

388

389 Sensitivity analyses of multiscale models can be difficult (70). ‘All-in-one’ sensitivity analyses  
390 are one method for exploring relationships between model parameters and outcomes by treating  
391 the full model as a black box and varying all parameters. In particular, ‘all-in-one’ sensitivity  
392 analyses are not always sufficient for understanding relationships between model parameters and  
393 outcomes, especially when a model is sufficiently complex and composed of multiple  
394 compartments or sub-models, as is the case with *HostSim*. As reviewed in (71), an ‘all-in-one’  
395 sensitivity analysis can be paired with an intra-compartmental model approach to provide  
396 comprehensive understanding of the model behavior across scales.

397

398 We present results from two separate sensitivity analyses. First, we vary parameters across the  
399 whole-host scale and granuloma-scale physiological compartments to create 500 unique virtual  
400 hosts. Each virtual host in this population includes multiple granulomas with separate parameter  
401 values. We perform an ‘all-in-one’ sensitivity analysis across these 500 virtual hosts to identify  
402 significant associations between parameters and whole-host clinical outcomes in TB (i.e., LTBI  
403 or active TB cases).

404

405 Next, to perform an intra-compartmental analysis, we select two representative hosts – one host  
406 that was classified as an active TB host and one that was classified as a TB eliminator according  
407 to their total lung CFU at day 200. For each representative host, we rerun the simulation 500  
408 times, varying only granuloma-scale parameters while fixing the blood and LN parameters  
409 (Supplementary Material Figure 1 displays granuloma CFU trajectories of each set of 500  
410 simulations). From each set of simulations, we calculate PRCC values to identify associations  
411 between granuloma-scale parameters and granuloma CFU at day 200. We performed False  
412 Discovery Rate test corrections (72) on all reported significant parameters.

413

### 414 *Pro- and anti-inflammatory profiles of HostSim granulomas*

415

416 We present a unitless measure that represents the ratio of pro- and anti- inflammatory cytokines  
417 for granulomas within *HostSim*. Cytokine units in *HostSim* granulomas are picograms per  
418 microliter, a measure that is consistent with previously published models of cytokine levels in  
419 granulomas (33,58,73). However, to investigate relative ratios of pro- and anti- inflammatory  
420 cytokines within each *HostSim* granuloma, we calculated the common logarithm (logarithm with  
421 base 10) of the IL-10, TNF- $\alpha$  and IFN- $\gamma$  cytokines and plotted these values in a 3-dimensional  
422 scatterplot. This allows for a comparison of granuloma inflammatory profiles, across orders of  
423 magnitudes of cytokine concentrations within the granuloma environment.

424  
425

#### 426 *Model analysis tools and simulation environment*

427

428 Model code and preliminary data analyses are written in MATLAB (R2020a). We solve the  
429 systems of ODEs using MATLAB's ode15s stiff solver, using a timestep of one day. At the end  
430 of each timestep, we perform cell recruitment and update granuloma cell, cytokine, and bacterial  
431 states as well as lymph node and blood cell concentrations. A single *in silico* individual  
432 simulation across 200 days of infection time can be performed on a 2-core laptop in  
433 approximately 5 minutes. We wrote bash scripts to submit multiple runs of *HostSim* on compute  
434 clusters. We perform post-processing statistical analysis, graphing and movie rendering within  
435 MATLAB (R2020a).

436  
437

## 438 **Results**

439

### 440 *HostSim recapitulates in vivo granuloma-scale and host-scale dynamics*

441

442 We calibrate *HostSim* to published datasets from NHPs across multiple scales following a single  
443 primary infection event. We utilized *CaliPro*, our protocol to define and perform calibration for  
444 computational models (63). *CaliPro* identifies a parameter space where each varied parameter  
445 has a range of values that correspond to a range of outcomes that match experimental datasets.  
446 For this work, the experimental data come from published NHP studies (10,25,36,65). Our  
447 *HostSim* website shows calibration datasets and references for each dataset  
448 (<http://malthus.micro.med.umich.edu/lab/movies/HostSim/>).

449

450 When sampling parameter sets within our calibrated parameter ranges, *HostSim* matches both the  
451 range of experimental outcomes and the dynamics outlined by datasets of primary Mtb infection  
452 derived from published NHP studies (Figure 2). At the granuloma scale, *in silico* granulomas  
453 from *HostSim* simulations are able to replicate NHP granuloma CFU, T cell and macrophage  
454 dynamics across time (Figure 2B, experimental data from previously published NHP studies  
455 (10,25,36,65)). Granuloma CFU peaks at approximately 35 days as macrophage and T cell  
456 counts increase. Following the peak, CFU, macrophage and T-cell counts correspondingly  
457 stabilize across time. At the host scale, *in silico* blood cell counts replicate NHP blood CD4+  
458 and CD8+ T cell data across time (26). Following infection, there is a slight peak in overall  
459 effector and effector memory T-cell types that precedes a growing number of central memory  
460 CD4+ and CD8+ T cells. (Figure 2 C&D). Across multiple scales, *HostSim* presents a 'virtual  
461 host' model of the immune response to Mtb infection.

462  
463  
464  
465

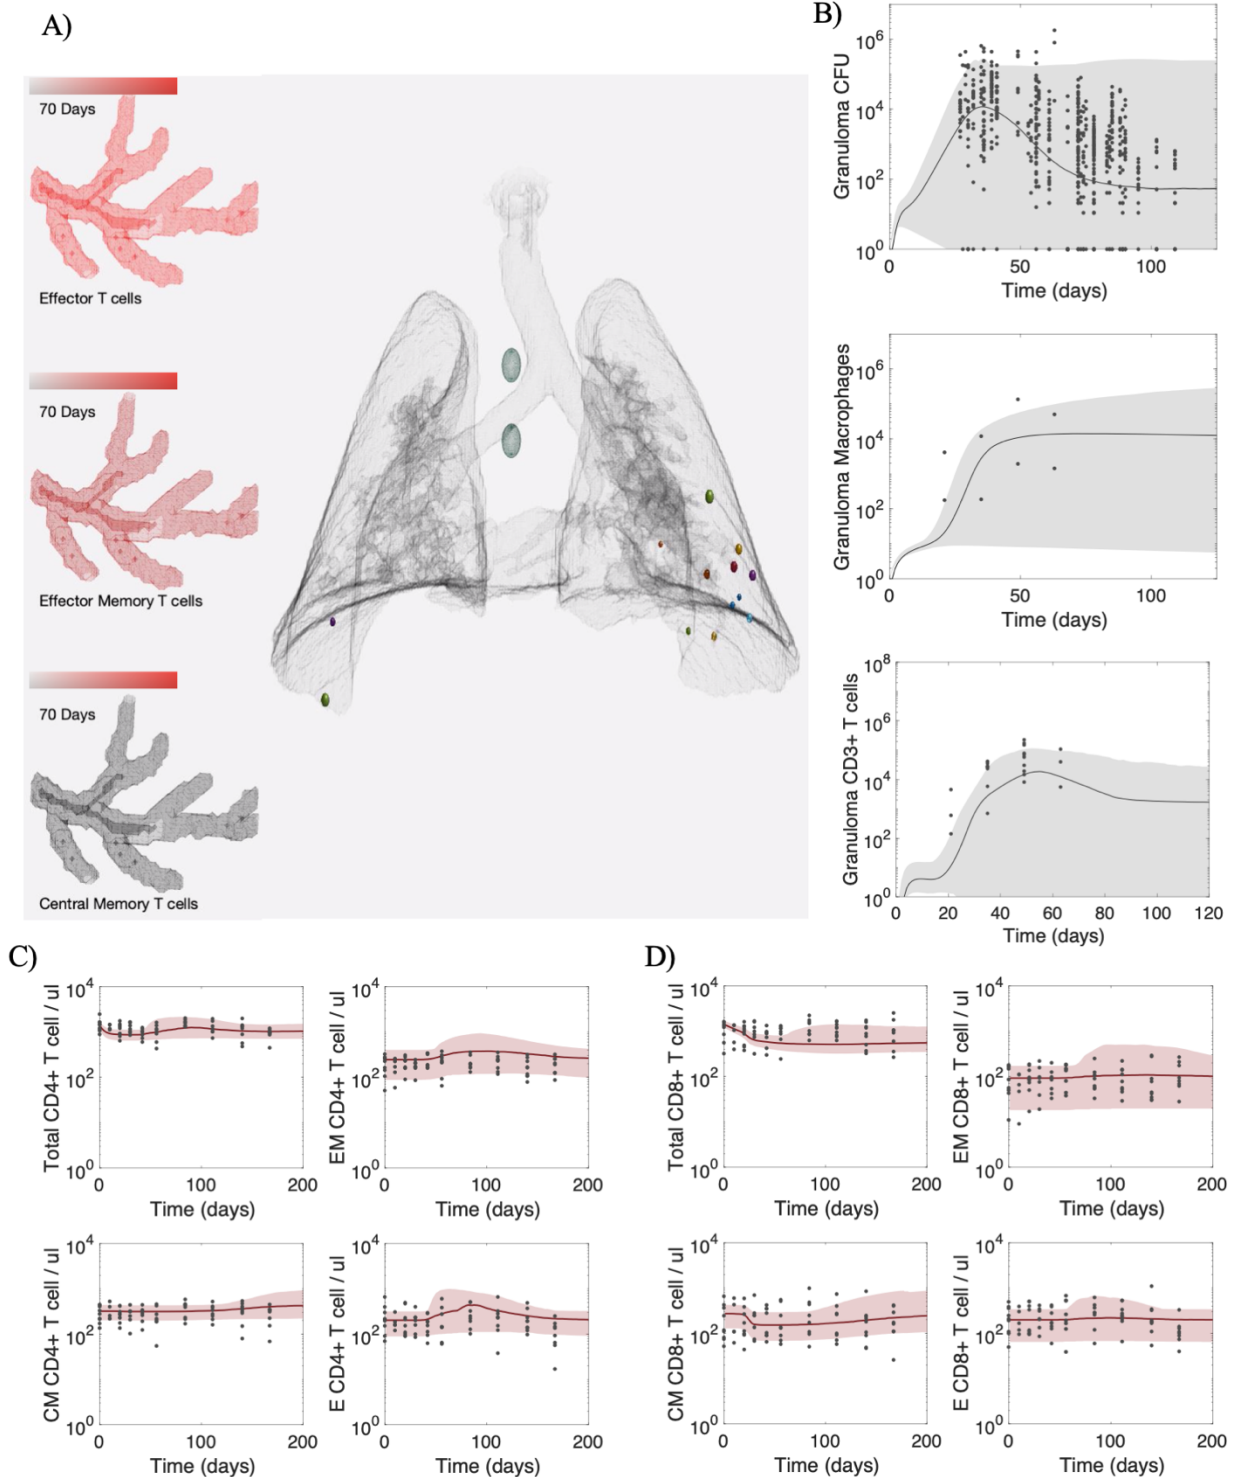

466  
467

**Fig 2: Calibrated HostSim recapitulates dynamics of Mtb infection at both granuloma-scale**

468 **and host-scale.** (A) Snapshot of *HostSim* time-lapse video showing virtual lungs, granulomas,  
469 lung draining lymph nodes, and blood cell concentrations for three cell types. Mtb-specific  
470 effector, effector memory and central memory T cells numbers within blood are qualitatively  
471 captured by a color change across time, from black (very few cells in the blood) to bright red  
472 (representing the maximum number of cells of that blood type across the simulation). At day 70,  
473 Mtb-specific effector T cells numbers peak, Mtb-specific effector memory T cells are continuing  
474 to grow in magnitude, and Mtb-specific central memory T cells have not yet started to  
475 differentiate in large numbers. Full time-lapse videos can be found at  
476 <http://malthus.micro.med.umich.edu/lab/movies/HostSim/>. We calibrated *HostSim* to published  
477 datasets from NHPs on (B) lung granuloma CFU, macrophage and T cell granuloma numbers  
478 from previous studies (26); (C) blood CD4<sup>+</sup> T cell data and (D) blood CD8<sup>+</sup> T cell data from  
479 both simulation and NHP following a single infection event in NHP studies (25,26,64,65).  
480 Published NHP study data are shown as black dots across the graphs. For direct comparison, we  
481 display simulation data as gray (granuloma outcomes) or red (blood outcomes) clouds that  
482 outlines the 1<sup>st</sup> and 99<sup>th</sup> percentile across 500 host simulations. Gray and red lines represent the  
483 medians of those simulations. Simulations plotted show from day of infection until day 200 post-  
484 infection.

485

486

487 *Emergent HostSim behavior across a virtual population matches spectrum of tuberculosis*

488

489 Humans present a spectrum of clinical outcomes in TB, including (but not limited to) complete  
490 elimination of infection, latent infection, and active TB disease (3). Work in NHPs have shown  
491 that total bacterial burden is associated with clinical outcomes. Specifically, total bacterial  
492 burden in active TB cases is significantly higher than that of LTBI monkeys (21). *HostSim*  
493 exhibits similarly heterogenous host-scale outcomes (Figure 3).

494

495 To explore ranges of host-scale outcomes in a virtual host study, we sample from our calibrated  
496 parameter space to generate a virtual population of 500 unique hosts. Each simulation begins  
497 with an inoculation dose of 10 CFU (selected to be consistent with inoculation of NHPs (68)),  
498 thereby starting the formation of 10 individual granulomas within the lung environment.  
499 Simulations run for 200 days. We calculate the total lung CFU by summing the individual  
500 granuloma CFU for all granulomas within a host.

501

502 Across our virtual population of 500 virtual hosts, the total lung CFU per host spans several  
503 orders of magnitude, from 0 CFU (infection elimination) to 10<sup>6</sup> CFU (Figure 3A). We delineate  
504 our virtual population into 3 groups according to their total lung CFU at day 200, analogous to  
505 the clinical classifications of NHPs 6-8 months following primary infection (69). We use the  
506 following cutoffs for classification: TB eliminators: total lung CFU < 1; Active TB cases: total  
507 lung CFU > 10<sup>5</sup>; LTBI: all other virtual hosts. Across our 500 virtual hosts, there are 24 TB  
508 eliminators, 110 active TB cases, and 366 LTBI individuals. Snapshots from representative  
509 simulations of these diverse outcomes are displayed in Figure 3D, 3E & 3F.

510

511 After classifying the virtual hosts by total lung CFU, we looked at two additional statistics. First,  
512 we examined the number of sterilized granulomas across the three different clinical  
513 classifications (Figure 3B). Our model predicts that ~75% of active TB cases include at least one

514 sterile granuloma. This finding is validated by a previously published NHP dataset, which  
515 showed 11 out of 13 monkeys with active TB had at least a single sterilized granuloma (9).

516  
517 Second, we looked at the number of virtual hosts that have individual granulomas with a high  
518 bacterial burden (defined as granulomas with  $5 \times 10^4$  CFU or higher; Figure 3C). As expected, all  
519 TB eliminators and the majority of LTBI virtual hosts do not contain a granuloma with a high  
520 bacterial burden. However, we see approximately 8% of our LTBI classified hosts include one  
521 high CFU granuloma. These cases indicate that our model may have the potential to capture  
522 incident or subclinical TB and may explain the spectrum nature of TB disease as these  
523 individuals could be more likely to reactivate or progress to active disease (5).

524  
525

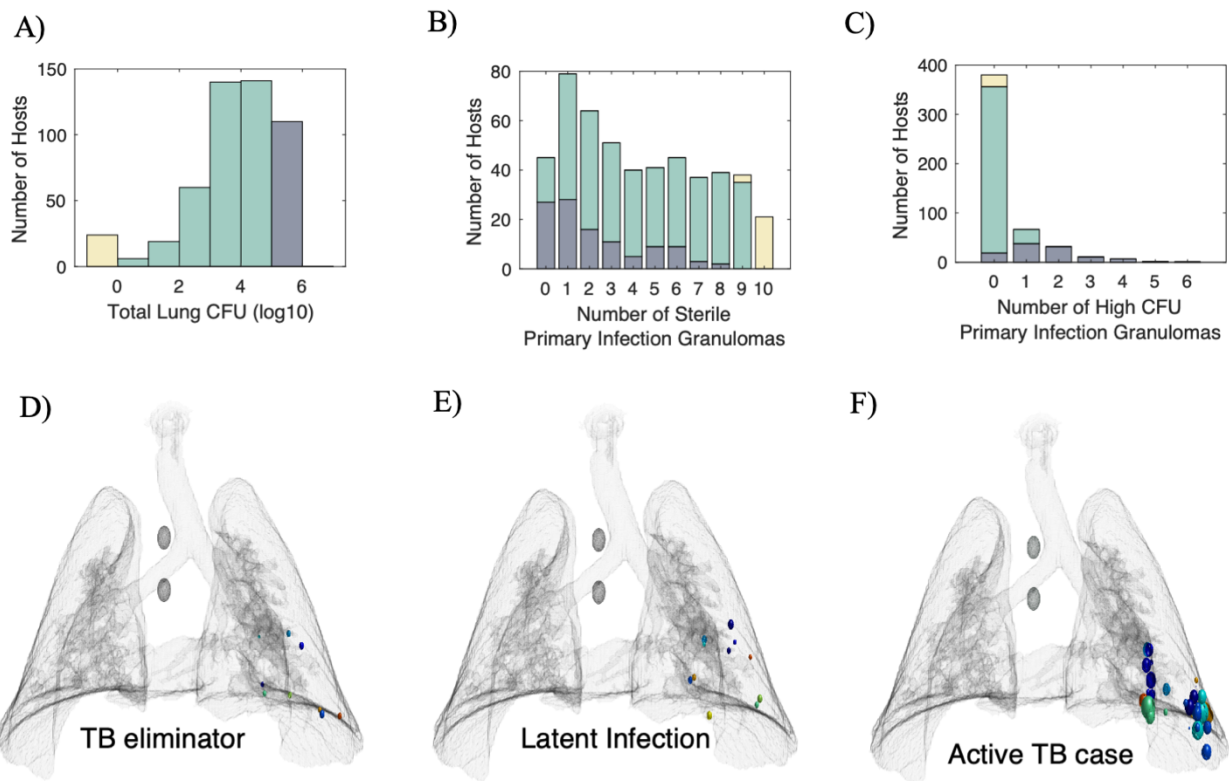

526  
527

528 **Fig 3: *HostSim* exhibits a spectrum of whole-host outcomes across a population of 500 virtual**  
529 **hosts.** (A) Histogram displaying the total lung CFU per host at day 200 across our virtual  
530 population of 500 hosts. We delineate the virtual population into three groups: TB eliminator  
531 (yellow), LTBI (green), or active TB cases (dark blue) according to the total Lung CFU. (B)  
532 Stacked bar chart displaying the number of sterile granulomas per host across TB eliminator,  
533 LTBI, or active TB cases. (C) Stacked bar chart displaying the number of high CFU granulomas  
534 per host across clinical scale outcomes: TB eliminator, LTBI, or active TB cases. (D, E, F)  
535 *HostSim* snapshots display virtual lung architecture and granuloma locations for representative  
536 TB eliminator, LTBI and active TB cases at day 200 post-infection.

537

538 *A multi-scale sensitivity analysis reveals adaptive immunity drives clinical classification and*  
539 *innate immunity impacts granuloma-scale outcomes*

540  
541  
542  
543  
544  
545  
546  
547  
548  
549  
550  
551  
552  
553  
554  
555  
556  
557  
558  
559  
560  
561  
562  
563  
564  
565  
566  
567  
568  
569  
570  
571  
572  
573  
574

We next use the model to investigate mechanisms that drive host-scale clinical outcomes. Using uncertainty and sensitivity analysis, we can identify these driving mechanisms across multiple scales of interest. First, we perform an ‘all-in-one’ sensitivity analysis (see Methods) on clinical classifications (see Figure 3) across the 500 virtual hosts from our calibrated parameter space. Table 1 highlights parameters found to be significantly correlated ( $p < 0.05$ ) with each clinical classification from our PRCC analysis. Not surprisingly, we find that elements of adaptive immune responses within LNs are main drivers of whole-host clinical outcomes. Specifically, the differentiation and proliferation of T cells within LNs are significantly associated with clinical scale outcomes (i.e. active TB, LTBI or TB eliminator). The significant, positive association between T-cell proliferation in LN and clinical classification at the whole-host scale represents an inter-physiologic compartmental effect – not only do LN parameters influence T-cell counts within the LN, but they influence whole-host scale clinical outcomes as well. Further, both Mtb-specific CD4+ and Mtb-specific CD8+ T cell parameters in the LN impact clinical-scale outcomes, lending further support to emerging studies showing the importance of CD8+ T cells in TB (45,68,74).

To explore the drivers of granuloma-scale variation within a host, we perform an intra-compartmental sensitivity analyses (see Methods) focusing solely on which granuloma-scale parameters are associated with granuloma CFU at day 200. This allows us to identify how granuloma scale parameters may contribute to heterogenous granuloma CFU outcomes within a host when blood and LN parameters are held fixed (PRCC values are given in Supplementary Material). The bottom half of Table 1 lists mechanisms that we identified from both the adaptive and innate immune responses. Multiple parameters that dictate macrophage behavior were identified as key drivers of granuloma CFU. Additionally, adaptive immune response parameters were also associated with reduced granuloma CFU (i.e., Fas:FasL cell death in Table 1).

Altogether, the results from our ‘all-in-one’ sensitivity analysis as well as our intra-compartmental analyses predict that while the adaptive immune response in LNs drive clinical-scale outcomes, the innate immune system does play an important role within a host by contributing to heterogeneity of granuloma CFU, as observed within humans and NHPs.

| Parameters associated with clinical-scale outcomes      | Description of parameters<br>‘All-in-One’ sensitivity analysis      |
|---------------------------------------------------------|---------------------------------------------------------------------|
| LN k13                                                  | Precursor CD8+ T cell proliferation within the lymph node           |
| LN k14                                                  | CD8+ T cell differentiation to CD8+ effector T cell in lymph node   |
| LN k4                                                   | Precursor CD4+ T cell proliferation within the lymph node           |
| LN k5                                                   | CD4+ T cell differentiation to CD4+ effector T cell in lymph node   |
| Parameters associated with granuloma-scale CFU outcomes | Description of parameters<br>Intra-compartment sensitivity analysis |
| k2                                                      | Resting macrophage infection rate                                   |

|         |                                                                   |
|---------|-------------------------------------------------------------------|
| c9      | Likelihood of resting macrophages to phagocytize bacteria         |
| N       | Carrying capacity of intracellular bacteria within macrophages    |
| k17     | Max rate of infected macrophage death from intracellular bacteria |
| k18     | Extracellular bacterial killing by resting macrophages            |
| k14a    | Fas:FasL induced apoptosis of MI                                  |
| alpha11 | IL-4 production from primed T cells                               |

575

576 **Table 1: Parameters identified as significant from sensitivity analysis.** For each analysis,  
577 parameters shown here have a PRCC absolute value of  $\rho > 0.1$  and  $p\text{-value} < 0.05$ . Parameters  
578 listed as associated with clinical outcomes are the result of our ‘all-in-one’ sensitivity analysis.  
579 Clinical-scale classifications were assigned a value of 0 (active TB case), 1 (LTBI) or 2 (TB  
580 eliminator) to calculate the PRCC value for each parameter. Parameters listed as associated with  
581 granuloma CFU were the result of our intra-compartment analysis. These parameters were  
582 significantly correlated with granuloma CFU at day 200. PRCC values are listed in  
583 Supplementary Material.

584

585

586 *Infection outcomes of virtual hosts are dose dependent*

587

588 In humans, a relationship between inoculation dose and severity of clinical disease has been  
589 hypothesized (75–77). To explore this in our virtual hosts, we performed a set of inoculation  
590 dose experiments using *HostSim*. We reran our virtual population of 500 hosts through 25  
591 simulated experiments. For each experiment we re-simulated the 500 virtual hosts with identical  
592 random seeds and parameter sets, varying only dose inoculum from 1 to 25 CFU. Figure 4  
593 displays the total lung CFU and clinical classification of those 500 hosts at day 200 following  
594 each of the 25 experiments.

595

596 As dose inoculum increases, the median lung CFU for the population of 500 hosts (at day 200  
597 post-infection) increases; however, the model predicts a range of outcomes across the population  
598 for each inoculation dose (Figure 4A). For example, among the 500 hosts inoculated with 25  
599 CFU, a few hosts had low levels of CFU within the lung ( $\text{CFU} < 100$ ). Conversely, after a dose  
600 inoculum of 1 CFU, some hosts still exhibited considerable infection, with total lung  $\text{CFU} > 10^5$ .

601

602 For each of the 25 dose experiments, clinical classifications of the virtual hosts based on the total  
603 lung CFU at 200 days post-infection are shown in Figure 4B. We delineated the virtual  
604 population into three clinical outcome groups as above, where TB eliminators have a total lung  
605  $\text{CFU} < 1$ , active TB cases have a total lung  $\text{CFU} > 10^5$  and all other hosts are classified as LTBI.  
606 After an inoculum of 25 CFU, ~55% of the simulations are classified as LTBI and ~45% are  
607 classified active TB cases at day 200 (Figure 4B). Thus, *HostSim* predictions agree with human  
608 association studies (75–77) suggesting TB disease severity is dose dependent.

609



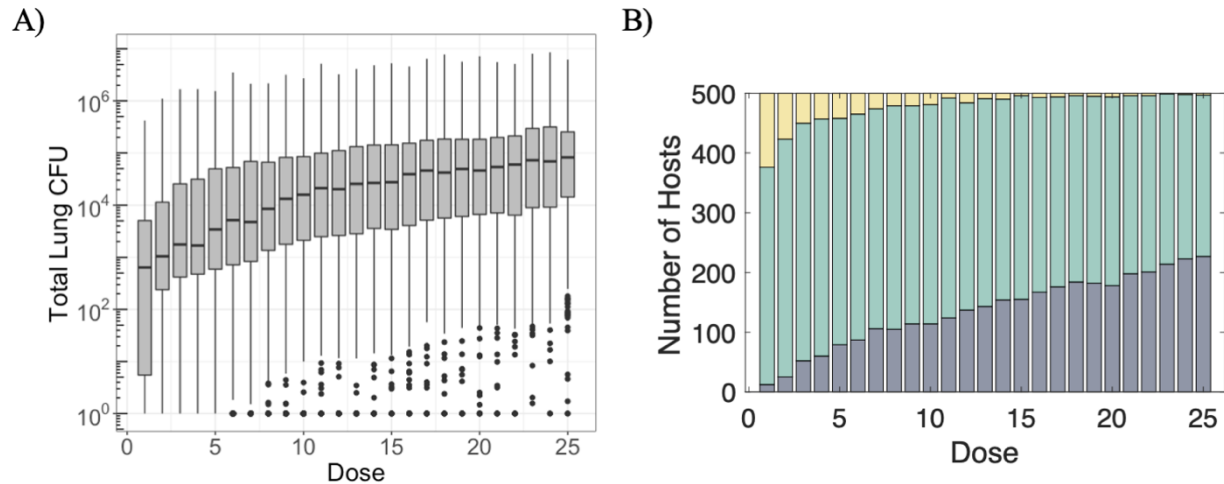

610  
611

612 **Fig 4: Infection outcomes at day 200 post-infection across a population of 500 virtual hosts**  
613 **are dose dependent.** A) Distribution of total lung CFU per host among the virtual population for  
614 the 25 inoculation dose experiments. Total lung CFU is calculated by summing CFU across all  
615 granulomas in a single host. B) Stacked bar charts display virtual host clinical-scale outcomes  
616 based on total lung CFU per host for the 25 inoculation dose experiments. Bar chart colors are  
617 the same as Figure 3 - TB eliminators (yellow), active TB cases (dark blue) or LTBI (green).

618  
619

620 *The fates of individual granulomas are heterogeneous within hosts*

621

622 In both human and NHP studies, individual granulomas within a single host can present a  
623 heterogeneous array of morphological, pathological, and immunological outcomes (41,78–80).  
624 In NHP studies, even granulomas within active TB monkeys can exhibit sterilization (9,21,81).  
625 Similarly, within individual hosts across our virtual population of 500 hosts, we identify a range  
626 of granuloma-scale outcomes, from total sterilization to uncontrolled bacterial growth. Figure 5  
627 displays individual granuloma CFU trajectories from five representative hosts ranging across  
628 different clinical-scale outcomes: TB eliminator, LTBI and active TB, respectively. Within-host  
629 variation is apparent in all hosts, but we highlight that host #5 has both sterilized and  
630 disseminating granulomas present. Dissemination occurs when bacteria escape one granuloma  
631 and seed the formation of another granuloma elsewhere in the lung environment (36).  
632 Dissemination granulomas can be identified when a new CFU trajectory begins at any timepoint  
633 after the initial infection (c.f. Figure 5B host #5). However, dissemination does not only occur  
634 in active TB hosts; we also note a dissemination event occurred in host #3 (Figure 5B), a virtual  
635 host that is still classified as LTBI according to our established criteria outlined in Figure 3A and  
636 Methods.

637

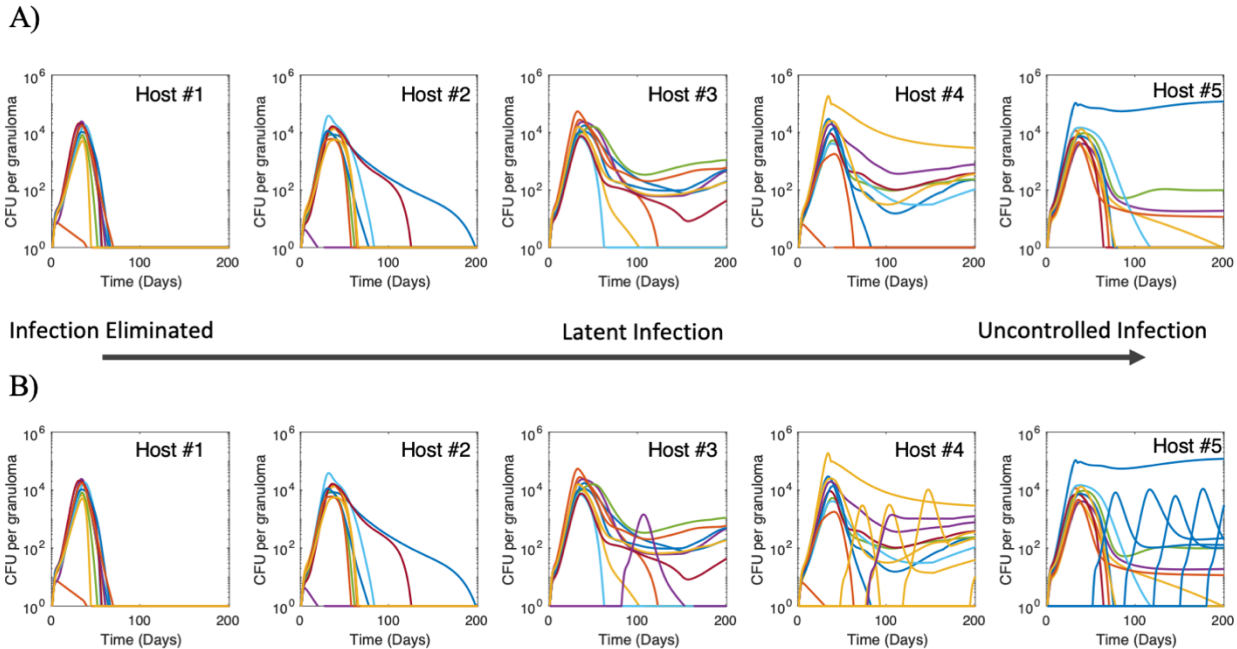

638  
639

640 **Fig 5: *HostSim* exhibits spectrum of granuloma-scale outcomes within hosts.** 500 virtual  
641 hosts were simulated to create our population, as shown in Figure 3. We identified 5  
642 representative hosts that exhibited a spectrum of whole-host outcomes (elimination, control and  
643 uncontrolled infection outcomes). Each graph is an individual host – the same five hosts are  
644 shown in (A) and (B). Each curve represents the CFU in a single granuloma within the host over  
645 time. Sterilization of an individual granuloma can be seen when CFU reaches 0 at any time post-  
646 infection. Dissemination occurs when a new curve begins at any time after initial infection.  
647 Dissemination granuloma CFU trajectories are colored to match the granuloma from which they  
648 disseminated. (A) Individual granuloma CFU trajectories for primary infection granulomas only  
649 within the 5 representative virtual hosts. B) Primary infection and dissemination granuloma CFU  
650 trajectories across the same 5 virtual hosts. Note that in the far-right of panel B), one granuloma  
651 (blue CFU trajectory) incurred multiple dissemination events, spurring the formation of multiple  
652 new granulomas across time.

653

654 For the majority of hosts across our virtual population, the fates of primary infection granulomas  
655 are sufficient to delineate clinical-scale outcomes at day 200. Out of the 500 *in silico* hosts, only  
656 8 hosts (~2%) are reclassified as active TB cases when considering both primary infection  
657 granuloma and disseminating granuloma bacterial burdens. That is, the outcomes of  
658 dissemination granulomas are often not necessary to classify clinical cohorts within *HostSim*.  
659 This prediction suggests that the fate of host clinical-scale outcomes is determined at early stages  
660 of infection, even prior to dissemination events that occur after inoculation.

661

662 *Early events across multiple scales during infection are predictive of TB clinical outcome*

663

664 Early events in Mtb infection are thought to impact late-stage clinical-scale outcomes  
665 (13,15,69,82). However, this is a difficult relationship to investigate clinically or experimentally.  
666 Once an animal is necropsied there is no way to know *a priori* if that animal would have  
667 progressed to active or latent infection. *HostSim* provides a tool through which we can relate

668 early events within the lungs and LNs to clinical-scale outcome (TB eliminators, LTBI, or active  
669 TB) determined months later across our virtual population of hosts. In the last section we predict  
670 that mechanisms operating within granulomas at early stages across multiple scales impact  
671 clinical-scale classifications. At the host scale, we investigate relationships between blood and  
672 lung immune cell counts. Additionally, we stratify lung T-cell counts by clinical-scale outcomes.  
673 At the granuloma scale, we examine the ratio of pro- and anti- inflammatory cytokines within the  
674 granuloma.

675  
676 First, we test whether there is a relationship between levels of immune cells in the blood and  
677 within the lung. Figure 6A shows an association between lung and blood levels of T cells at day  
678 50 for four separate T cell phenotypes (Mtb-specific CD4+ effector, effector memory and Mtb-  
679 specific CD8+ effector, effector memory) across the 500 virtual hosts. Day 50 was selected as it  
680 is typically the height of effector-expansion within in the model, timing that is supported by the  
681 NHP granuloma and blood T cell datasets (c.f. Figure 2). Each datapoint is colored according to  
682 the simulations' clinical outcomes at day 200. Note that there is a relationship between numbers  
683 of lung and blood CD4+ effector T cells and CD8+ effector T cells ( $r = 0.5$ ,  $p < 0.01$  and  $r =$   
684  $0.61$ ,  $p < 0.01$ , respectively). However, by day 200 (Figure 6B), the time point we use for  
685 clinical classification, this relationship between blood and lung numbers is less clear ( $r = 0.3$ ,  $p <$   
686  $0.01$  and  $r = 0.14$ ,  $p < 0.01$ ; for CD4+ and CD8+ effector T cells, respectively).

687  
688 Second, we identify a fold-change difference in numbers of lung T cells between days 30 and 40  
689 post-infection as indicative of clinical classification 160 simulation days later (Figure 6C).  
690 Across the four Mtb-specific T cell phenotypes that are recruited into the lung (Mtb-specific  
691 CD4+ effector, effector memory and Mtb-specific CD8+ effector, effector memory), virtual  
692 hosts that are classified as TB eliminators typically had a larger fold-change difference between  
693 days 30 and 40 than did virtual hosts that are classified as active TB or LTBI cases at day 200  
694 (Supplementary Material Table 2 shows Vargha and Delaney's A measure for effect size  
695 comparisons across all clinical outcomes). Specifically, the median fold change between days 30  
696 and 40 of numbers of Mtb-specific CD8+ effector memory T cells in TB eliminator virtual hosts  
697 is approximately 10x larger than that of active TB virtual hosts. We observe a similar difference  
698 between LTBI and active TB virtual hosts for numbers of Mtb-specific CD4+ effector T cells.  
699 These results suggest that numbers of these cell types have a crucial and early role that impacts  
700 clinical classifications made over 150 days later.

701  
702 Finally, the cytokine profile of granulomas at early time points is indicative of downstream  
703 clinical-scale outcomes. Figure 5D shows a three-dimensional scatterplot of pro- and anti-  
704 inflammatory cytokine concentrations (pg/mL of IFN- $\gamma$ , TNF- $\alpha$ , and IL-10) of every granuloma  
705 at day 60 across the 500 virtual hosts. Each granuloma data point is colored according to the  
706 classification of the host within which the granuloma resides. Note that a cluster emerges  
707 wherein granulomas with high levels of IFN- $\gamma$ , low levels of TNF- $\alpha$ , and low levels of IL-10 are  
708 indicative of granulomas that are destined to be within active hosts. By day 200 (Figure 6E), this  
709 cluster cannot be as easily separated from the other simulations. Taken together, these  
710 predictions suggest that the dynamic balance of pro- and anti-inflammatory cytokines across time  
711 (83) could obscure this finding for granulomas sampled at later timepoints.

712

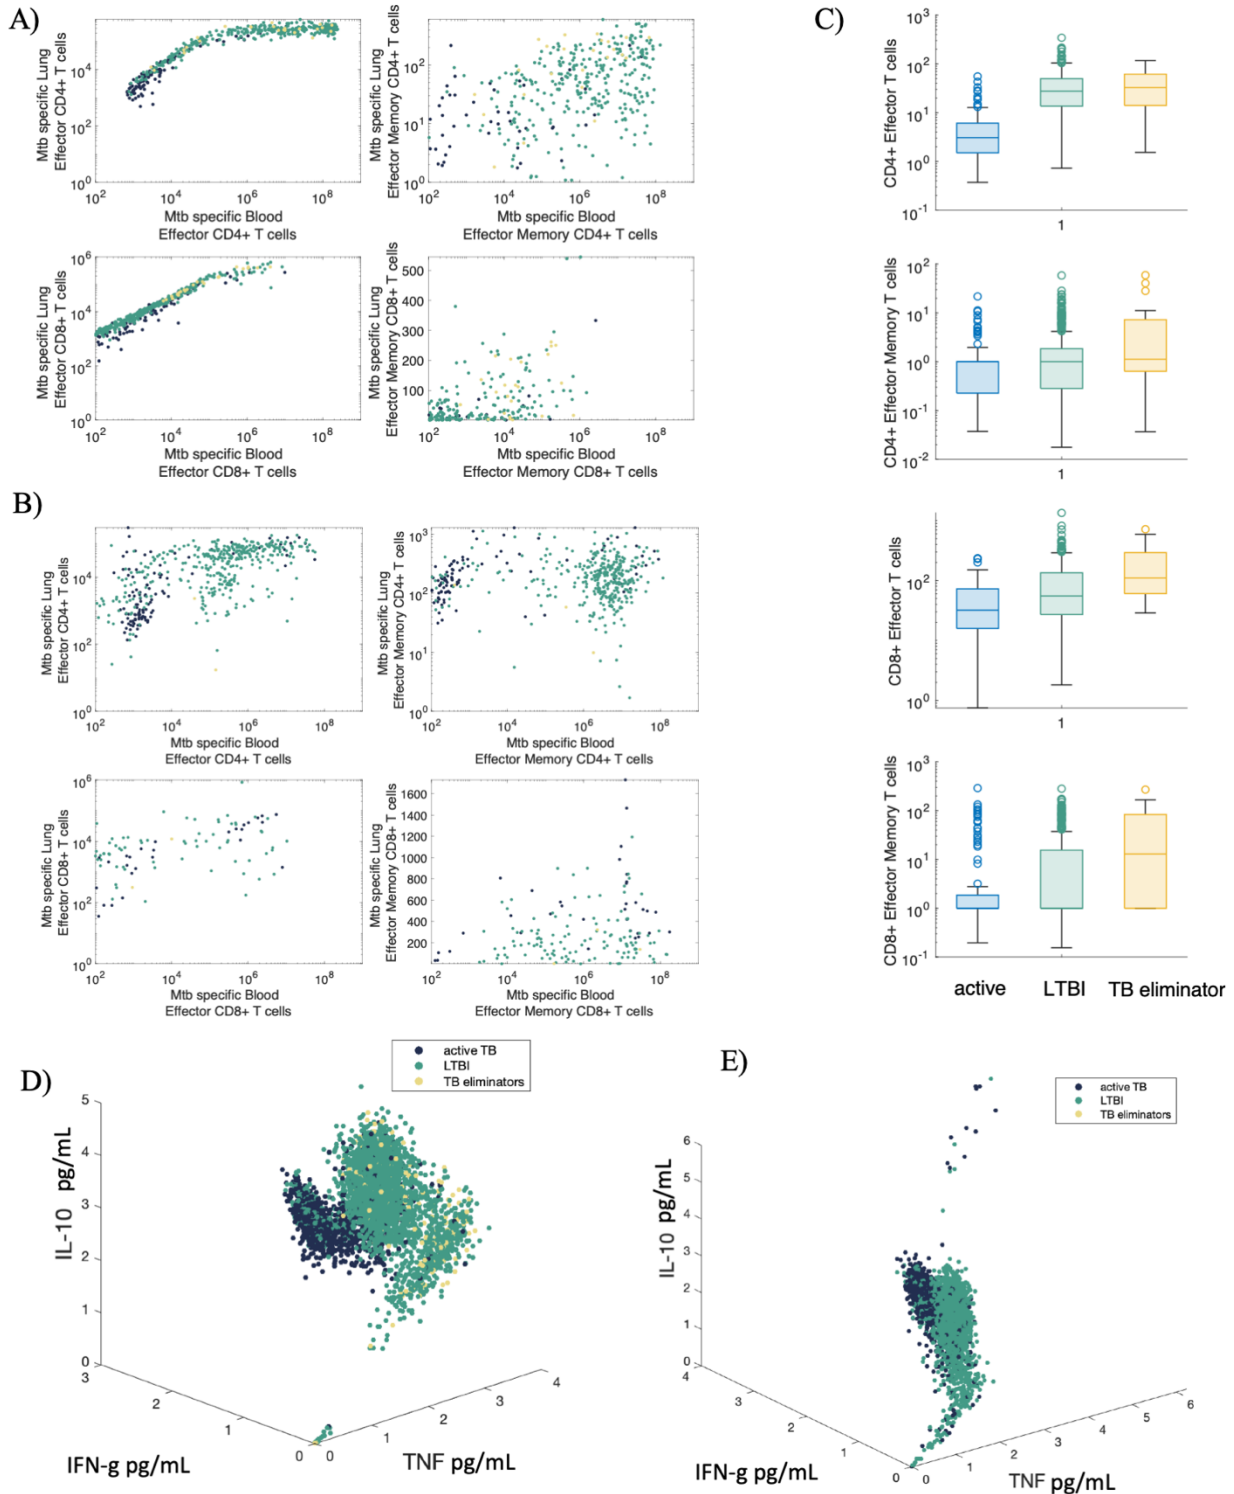

713  
714  
715  
716  
717  
718

**Fig 6: Early events at granuloma-scale and host-scale can predict clinical classifications across a population of 500 virtual hosts.** Scatterplots display blood (x-axis) and lung (y-axis) cell counts for Mtb-specific effector and effector memory CD4+ and CD8+ T cells at day 50 (A) and day 200 (B). C) The fold change in numbers of lung T-cells between day 30 and day 40,

719 grouped by clinical classifications at day 200. Each graph displays the fold change for a separate  
720 T cell phenotype in the lung. All granulomas from 500 virtual hosts plotted according to relative  
721 concentration TNF, IFN- $\gamma$  and IL-10 cytokine concentrations (pg/mL) on a log scale (see  
722 Methods) at day 60 (D) and day 200 (E) colored according to the classification of the host within  
723 which the granuloma resides. Across all plots, dark blue = active TB cases, green = LTBI,  
724 yellow = TB eliminators.

725

## 726 Discussion

727

728 Tuberculosis is a complex and heterogenous disease. At the host-scale, the disease can manifest  
729 across a spectrum of clinical-scale outcomes, including but not limited to TB eliminators, LTBI  
730 or active TB (3). Within a single host, individual granulomas are diverse in terms of morphology,  
731 immunology and bacterial burden. One of the most highly studied aspects of TB pathology is the  
732 granuloma, but a link between granuloma-scale outcomes and whole-host outcomes has yet to be  
733 elaborated. Even active TB cases can contain a non-uniform collection of granulomas, wherein a  
734 subset of granulomas sterilize bacteria despite a collective failure by the host to rid the body of  
735 disease (9). Using experimental studies alone, it can be challenging to identify mechanisms  
736 responsible for such heterogeneous outcomes within and across hosts in TB. Mathematical and  
737 computational modeling approaches provide powerful tools to link events operating within  
738 multiple physiological compartments to host-scale clinical outcomes.

739

740 In pursuit of a better understanding of events occurring across multiple-biological scales leading  
741 to distinct clinical-scale outcomes, we develop a first-of-its-kind, multi-scale and multi-  
742 compartment model of whole-host Mtb infection called *HostSim*. This generalized model is an  
743 initial step toward the realization of personalized digital twins in TB research (84,85). We  
744 calibrate and validate *HostSim* against previously published, distinct NHP datasets that span  
745 cellular, bacterial, granuloma and whole-host scales and make predictions about events that may  
746 cause heterogeneous outcomes across multiple scales.

747

748 An effective weapon in the global public health battle against TB is identification of robust  
749 biomarkers for disease diagnosis and treatment. In TB, there have been many studies and  
750 debates regarding both the identification and usefulness of biomarkers (86–93). One barrier to  
751 identifying robust biomarkers is the variability in disease outcomes between, and within, hosts at  
752 a population scale. In this work, we presented evidence for another relatively unconsidered  
753 barrier: biomarkers are transient over time by their very nature. Here we have predicted that the  
754 relationship between numbers of blood immune cells and numbers of cells within the lung may  
755 only be well-defined at early time points post-infection. Months, or years later, when an  
756 individual might present in clinic (94), blood immune cell levels may not accurately reflect  
757 events within the lung and therefore may not be a useful compartment to sample when  
758 delineating disease status or progression. This reflects a key *HostSim* prediction: recent efforts  
759 to identify events in the blood that may correlate with events in lung (23,24) may not be  
760 generalizable to every time point for every patient. This prediction is consistent with a recent  
761 NHP study that shows blood T-cell responses do not consistently reflect T-cell responses within  
762 granulomas (25). These findings are more broadly supported by the idea of a dynamically  
763 balanced immune response that occurs across time during chronic infections (83).

764

765 In TB animal studies, experimentalists are often unable to know *a priori* if animals necropsied at  
766 early time points were destined to be classified as active or latent (69). Using our virtual  
767 population of 500 hosts, we are able to show that early events at both granuloma- and host-scales  
768 can be predictive of clinical-scale outcomes ~150 days later (at 200 days p.i.). These predictions  
769 are potentially useful for experimentalists, who can use analogous experimental techniques (such  
770 as serial intravascular staining (95), or IHC cytokine staining of granulomas (96)) to make  
771 educated predictions about downstream clinical-scale outcomes. Further, these *HostSim*  
772 predictions contribute to a growing body of evidence that suggests early immune events matter in  
773 TB (15,82,97).

774  
775 As the primary intracellular niche for *Mtb* during both early and chronic stages of infection,  
776 macrophages play a central role in TB pathology (98). Recent experimental work has identified  
777 Bacille Calmette Guérin (BCG), the only licensed TB vaccine, as a potentially potent innate  
778 immune response stimulator by educating macrophage progenitors (99,100). In this work, we  
779 used sensitivity analysis techniques to show that parameters governing interactions between *Mtb*  
780 and macrophages at the granuloma-scale are important contributors to the heterogenous  
781 granuloma outcomes. Together, these studies and our predictions suggest that macrophages  
782 could be viable targets for future therapeutic interventions in TB. This follows as macrophages  
783 are crucial cells that sit at the intersection of adaptive and innate immune responses against *Mtb*.

784  
785 There are a few limitations to our study and model. First, while we call *HostSim* a whole-host  
786 model of *Mtb* infection, we only represent three physiologically unique compartments (lung,  
787 lung-draining lymph nodes and blood). Some of the most progressive forms of TB include  
788 extrapulmonary disease (101). As it is beyond the scope of this work, we do not capture the  
789 dynamics of extrapulmonary disease with this model, though future work could focus on the  
790 dissemination of bacteria into the LN as an initial step to model extrapulmonary disease. Second,  
791 while *HostSim* has been developed based on previous modeling efforts and extensive NHP  
792 datasets, it does not include all the various cell types present within the granuloma environment  
793 (i.e. neutrophils (102,103) or fibroblasts (104)). These cells were not included here primarily  
794 because datasets were not as readily available or mechanistic functions of these cells within  
795 granulomas are not as well characterized. The *HostSim* modeling framework is flexible and can  
796 include these cell types in the future as more data become available about their role in TB  
797 granulomas. This limitation extends to the LN and blood compartment models as well, where we  
798 do not capture the events of every cell type involved in *Mtb* infection (i.e., B cells in the LN).  
799 Finally, *HostSim* does not capture physical symptoms of TB disease such as coughing or weight  
800 loss. Accordingly, we assumed total lung bacterial burden can be used as a proxy for clinical-  
801 scale classifications of TB. This assumption is not without precedent. Antibiotic studies in TB  
802 frequently use sputum-based assays as a proxy for drug efficacy and assessment of treatment  
803 progression in humans (105). Further, NHP studies have shown that total bacterial burden in  
804 active TB cases is significantly higher than that of LTBI monkeys, although the same study did  
805 show a small number of active cases with a bacterial burden similar to that of latent NHPs (21).  
806 Thus, our cut-off for active TB cases (total lung CFU > 10<sup>5</sup>) in *HostSim* virtual hosts is unable to  
807 capture individuals that may have symptomatic TB but relatively low bacterial burdens.  
808 However, as more data become available regarding the relationship between symptomatic TB  
809 and bacterial burden, future work can integrate those findings into our *HostSim* framework,

810 perhaps by incorporating a bronchoalveolar lavage (BAL) compartment, for direct comparison to  
811 sputum samples.

812  
813 In conclusion, we utilized a computational modeling framework to better understand the  
814 relationship between within-host dynamics and clinical outcomes in TB. We present *HostSim*:  
815 the first whole-host model to track events across granuloma- and host- scales. Using *HostSim*,  
816 we make predictions about relationships between immune cell counts in the blood and lungs and  
817 the role of adaptive and innate immune cells in granuloma-scale and host-scale outcomes. In  
818 particular, we predict that adaptive immunity generated in lymph nodes drives clinical  
819 classifications across hosts in TB, but that innate immunity can drive heterogeneous granuloma  
820 outcomes within a single host. We posit that *HostSim* offers a powerful computational tool that  
821 can be used in concert with experimental approaches to understand and predict events about  
822 various aspects of TB disease and therapeutics.

823

824

825

## 826 **Acknowledgements**

827

828 This research was supported by The Wellcome Trust Delta Leap Program (DEK, JJJ) and NIH  
829 Grants R01AI123093 and R01 AI50684 (DEK) and U01 HL131072 awarded to DEK and JJJ.  
830 LRJ was funded by a University of Michigan Rackham Predoctoral Fellowship. Simulations  
831 also use resources of the National Energy Research Scientific Computing Center, which is  
832 supported by the Office of Science of the U.S. Department of Energy under Contract No. ACI-  
833 1053575 and the Extreme Science and Engineering Discovery Environment (XSEDE), which is  
834 supported by National Science Foundation Grant MCB140228. We thank JoAnne Flynn, Hannah  
835 Gideon and their lab members for access to previously published TB datasets.

836

837

838

839

840

841

842

843

844

845

846 **References**

847

- 848 1. WHO. WHO Global Tuberculosis Report 2019. World Health Organization Press. 2019.
- 849 2. Lin PL, Flynn JL. The End of the Binary Era: Revisiting the Spectrum of Tuberculosis.  
850 *The Journal of Immunology*. 2018;201(9):2541–8.
- 851 3. Barry CE, Boshoff HI, Dartois V, Dick T, Ehrst S, Flynn JA, et al. The spectrum of latent  
852 tuberculosis: Rethinking the biology and intervention strategies. Vol. 7, *Nature Reviews*  
853 *Microbiology*. 2009. p. 845–55.
- 854 4. Williams CM, Abdulwhhab M, Birring SS, de Kock E, Garton NJ, Townsend E, et al.  
855 Exhaled Mycobacterium tuberculosis output and detection of subclinical disease by face-  
856 mask sampling: prospective observational studies. *The Lancet Infectious Diseases*.  
857 2020;20(5):607–17.
- 858 5. Drain PK, Bajema KL, Dowdy D, Dheda K, Naidoo K, Schumacher SG, et al. Incipient  
859 and subclinical tuberculosis: a clinical review of early stages and progression of infection.  
860 *Clinical microbiology reviews*. 2018;31(4).
- 861 6. Flynn JL, Chan J. Tuberculosis: latency and reactivation. *Infection and immunity*  
862 [Internet]. 2001 Jul;69(7):4195–201. Available from:  
863 <https://pubmed.ncbi.nlm.nih.gov/11401954>
- 864 7. Dye C, Scheele S, Pathania V, Raviglione MC. Global burden of tuberculosis: estimated  
865 incidence, prevalence, and mortality by country. *Jama*. 1999;282(7):677–86.
- 866 8. Flynn JL, Gideon HP, Mattila JT, Lin P ling. Immunology studies in non-human primate  
867 models of tuberculosis. *Immunological Reviews*. 2015;264(1):60–73.
- 868 9. Lin PL, Ford CB, Coleman MT, Myers AJ, Gawande R, Ioerger T, et al. Sterilization of  
869 granulomas is common in active and latent tuberculosis despite within-host variability in  
870 bacterial killing. *Nature Medicine*. 2014;20(1):75–9.
- 871 10. Martin CJ, Cadena AM, Leung VW, Lin PL, Maiello P, Hicks N, et al. Digitally  
872 Barcoding Mycobacterium tuberculosis Reveals In Vivo Infection Dynamics in the  
873 Macaque Model of Tuberculosis . *mBio*. 2017;8(3).
- 874 11. Joosten SA, Ottenhoff THM, Lewinsohn DM, Hoft DF, Moody DB, Seshadri C, et al.  
875 Harnessing donor unrestricted T-cells for new vaccines against tuberculosis. *Vaccine*  
876 [Internet]. 2019/04/27. 2019 May 21;37(23):3022–30. Available from:  
877 <https://pubmed.ncbi.nlm.nih.gov/31040086>
- 878 12. Diedrich CR, Mattila JT, Klein E, Janssen C, Phuah J, Sturgeon TJ, et al. Reactivation of  
879 latent tuberculosis in cynomolgus macaques infected with SIV is associated with early  
880 peripheral T cell depletion and not virus load. *PLoS ONE*. 2010;5(3).
- 881 13. Yao S, Huang D, Chen CY, Halliday L, Wang RC, Chen ZW. CD4 + T Cells Contain  
882 Early Extrapulmonary Tuberculosis (TB) Dissemination and Rapid TB Progression and  
883 Sustain Multieffector Functions of CD8 + T and CD3 – Lymphocytes: Mechanisms of  
884 CD4 + T Cell Immunity . *The Journal of Immunology*. 2014;192(5):2120–32.
- 885 14. Sakai S, Mayer-Barber KD, Barber DL. Defining features of protective CD4 T cell  
886 responses to Mycobacterium tuberculosis. Vol. 29, *Current Opinion in Immunology*.  
887 2014. p. 137–42.
- 888 15. Cadena AM, Flynn JL, Fortune SM. The importance of first impressions: Early events in  
889 mycobacterium tuberculosis infection influence outcome. Vol. 7, *mBio*. 2016.



- 890 16. Reiley WW, Calayag MD, Wittmer ST, Huntington JL, Pearl JE, Fountain JJ, et al.  
891 ESAT-6-specific CD4 T cell responses to aerosol Mycobacterium tuberculosis infection  
892 are initiated in the mediastinal lymph nodes. *Proceedings of the National Academy of*  
893 *Sciences of the United States of America*. 2008;105(31):10961–6.
- 894 17. Gallegos AM, Pamer EG, Glickman MS. Delayed protection by ESAT-6-specific effector  
895 CD4+ T cells after airborne *M. tuberculosis* infection. *Journal of Experimental Medicine*.  
896 2008;205(10):2359–68.
- 897 18. Matzinger P. The evolution of the danger theory. Interview by Lauren Constable,  
898 Commissioning Editor. *Expert review of clinical immunology* [Internet]. 2012  
899 May;8(4):311–7. Available from: <https://pubmed.ncbi.nlm.nih.gov/22607177>
- 900 19. Lin PL, Myers A, Smith L, Bigbee C, Bigbee M, Fuhrman C, et al. Tumor necrosis factor  
901 neutralization results in disseminated disease in acute and latent Mycobacterium  
902 tuberculosis infection with normal granuloma structure in a cynomolgus macaque model.  
903 *Arthritis and Rheumatism*. 2010;62(2):340–50.
- 904 20. Mattila JT, Diedrich CR, Lin PL, Phuah J, Flynn JL. Simian Immunodeficiency Virus-  
905 Induced Changes in T Cell Cytokine Responses in Cynomolgus Macaques with Latent  
906 Mycobacterium tuberculosis Infection Are Associated with Timing of Reactivation . *The*  
907 *Journal of Immunology*. 2011;186(6):3527–37.
- 908 21. Lin PL, Rodgers M, Smith L, Bigbee M, Myers A, Bigbee C, et al. Quantitative  
909 comparison of active and latent tuberculosis in the cynomolgus macaque model. *Infection*  
910 *and Immunity*. 2009;77(10):4631–42.
- 911 22. Willis JCD, Lord GM. Immune biomarkers: the promises and pitfalls of personalized  
912 medicine. *Nature Reviews Immunology* [Internet]. 2015;15(5):323–9. Available from:  
913 <https://doi.org/10.1038/nri3820>
- 914 23. Mpande CAM, Musvosvi M, Rozot V, Mosito B, Reid TD, Schreuder C, et al.  
915 Mycobacterium tuberculosis-specific T cell activation identifies individuals at high risk of  
916 tuberculosis disease. *medRxiv* [Internet]. 2020 Jan 1;2020.06.26.20135665. Available  
917 from: <http://medrxiv.org/content/early/2020/06/29/2020.06.26.20135665.abstract>
- 918 24. Rozot V, Vigano S, Mazza-Stalder J, Idrizi E, Day CL, Perreau M, et al. Mycobacterium  
919 tuberculosis-specific CD8+ T cells are functionally and phenotypically different between  
920 latent infection and active disease. *European Journal of Immunology*. 2013;43(6):1568–  
921 77.
- 922 25. Gideon HP, Phuah JY, Myers AJ, Bryson BD, Rodgers MA, Coleman MT, et al.  
923 Variability in Tuberculosis Granuloma T Cell Responses Exists, but a Balance of Pro- and  
924 Anti-inflammatory Cytokines Is Associated with Sterilization. *PLoS Pathogens*.  
925 2015;11(1):1–28.
- 926 26. Marino S, Gideon HP, Gong C, Mankad S, McCrone JT, Lin PL, et al. Computational and  
927 Empirical Studies Predict Mycobacterium tuberculosis-Specific T Cells as a Biomarker  
928 for Infection Outcome. *PLoS Computational Biology*. 2016;12(4).
- 929 27. Kirschner D, Pienaar E, Marino S, Linderman JJ. A review of computational and  
930 mathematical modeling contributions to our understanding of Mycobacterium tuberculosis  
931 within-host infection and treatment. *Current Opinion in Systems Biology* [Internet].  
932 2017;3:170–85. Available from:  
933 <http://linkinghub.elsevier.com/retrieve/pii/S2452310016300117>

- 934 28. Sershen CL, Plimpton SJ, May EE. Oxygen modulates the effectiveness of granuloma  
935 mediated host response to Mycobacterium tuberculosis: A multiscale computational  
936 biology approach. *Frontiers in Cellular and Infection Microbiology*. 2016;6(FEB).
- 937 29. Cicchese JM, Dartois V, Kirschner DE, Linderman JJ. Both Pharmacokinetic Variability  
938 and Granuloma Heterogeneity Impact the Ability of the First-Line Antibiotics to Sterilize  
939 Tuberculosis Granulomas [Internet]. Vol. 11, *Frontiers in Pharmacology*. 2020. p. 333.  
940 Available from: <https://www.frontiersin.org/article/10.3389/fphar.2020.00333>
- 941 30. Pienaar E, Sarathy J, Prideaux B, Dietzold J, Dartois V, Kirschner DE, et al. Comparing  
942 efficacies of moxifloxacin, levofloxacin and gatifloxacin in tuberculosis granulomas using  
943 a multi-scale systems pharmacology approach. *PLoS computational biology*.  
944 2017;13(8):e1005650.
- 945 31. Pitcher M, Bowness R, Dobson S, Eftimie R, Gillespie S. Modelling the effects of  
946 environmental heterogeneity within the lung on the tuberculosis life-cycle. *Journal of*  
947 *Theoretical Biology* [Internet]. 2019;110381. Available from:  
948 <http://www.sciencedirect.com/science/article/pii/S0022519320302368>
- 949 32. Català M, Bechini J, Tenesa M, Pérez R, Moya M, Vilaplana C, et al. Modelling the  
950 dynamics of tuberculosis lesions in a virtual lung: Role of the bronchial tree in  
951 endogenous reinfection. *PLoS Computational Biology*. 2020;16(5).
- 952 33. Wigginton JE, Kirschner D. A Model to Predict Cell-Mediated Immune Regulatory  
953 Mechanisms During Human Infection with Mycobacterium tuberculosis. *The Journal of*  
954 *Immunology*. 2001;166(3):1951–67.
- 955 34. Fallahi-Sichani M, El-Kebir M, Marino S, Kirschner DE, Linderman JJ. Multiscale  
956 Computational Modeling Reveals a Critical Role for TNF- Receptor 1 Dynamics in  
957 Tuberculosis Granuloma Formation. *The Journal of Immunology* [Internet].  
958 2011;186(6):3472–83. Available from:  
959 [http://www.pubmedcentral.nih.gov/articlerender.fcgi?artid=3127549&tool=pmcentrez&](http://www.pubmedcentral.nih.gov/articlerender.fcgi?artid=3127549&tool=pmcentrez&rendertype=abstract)  
960 [rendertype=abstract](http://www.pubmedcentral.nih.gov/articlerender.fcgi?artid=3127549&tool=pmcentrez&rendertype=abstract)
- 961 35. Bartelink IH, Zhang N, Keizer RJ, Strydom N, Converse PJ, Dooley KE, et al. New  
962 Paradigm for Translational Modeling to Predict Long-term Tuberculosis Treatment  
963 Response. *Clinical and Translational Science*. 2017;10(5):366–79.
- 964 36. Wessler T, Joslyn LR, Borish HJ, Gideon HP, Flynn JL, Kirschner DE, et al. A  
965 computational model tracks whole-lung Mycobacterium tuberculosis infection and  
966 predicts factors that inhibit dissemination. *PLOS Computational Biology* [Internet]. 2020  
967 May 20;16(5):e1007280. Available from: <https://doi.org/10.1371/journal.pcbi.1007280>
- 968 37. Marino S, Kirschner D. A Multi-Compartment Hybrid Computational Model Predicts Key  
969 Roles for Dendritic Cells in Tuberculosis Infection. *Computation* [Internet]. 2016;4(4):39.  
970 Available from: <http://www.mdpi.com/2079-3197/4/4/39>
- 971 38. Joslyn LR, Pienaar E, DiFazio RM, Suliman S, Kagina BM, Flynn JAL, et al. Integrating  
972 non-human primate, human, and mathematical studies to determine the influence of BCG  
973 timing on H56 vaccine outcomes. *Frontiers in Microbiology*. 2018;9(AUG).
- 974 39. Ganchua SKC, White AG, Klein EC, Flynn JL. Lymph nodes—The neglected battlefield  
975 in tuberculosis. *PLOS Pathogens* [Internet]. 2020 Aug 13;16(8):e1008632-. Available  
976 from: <https://doi.org/10.1371/journal.ppat.1008632>
- 977 40. Wolf AJ, Desvignes L, Linas B, Banaiee N, Tamura T, Takatsu K, et al. Initiation of the  
978 adaptive immune response to Mycobacterium tuberculosis depends on antigen production  
979 in the local lymph node, not the lungs. *The Journal of experimental medicine* [Internet].

- 980 2007/12/24. 2008 Jan 21;205(1):105–15. Available from:  
981 <https://pubmed.ncbi.nlm.nih.gov/18158321>
- 982 41. Cadena AM, Fortune SM, Flynn JL. Heterogeneity in tuberculosis. *Nature Reviews*  
983 *Immunology*. 2017;17(11):691–702.
- 984 42. Segovia-Juarez JL, Ganguli S, Kirschner D. Identifying control mechanisms of granuloma  
985 formation during *M. tuberculosis* infection using an agent-based model. *Journal of*  
986 *Theoretical Biology*. 2004;231(3):357–76.
- 987 43. Kaufmann SHE. Tuberculosis: back on the immunologists’ agenda. *Immunity*.  
988 2006;24(4):351–7.
- 989 44. Moguche AO, Shafiani S, Clemons C, Larson RP, Dinh C, Higdon LE, et al. ICOS and  
990 Bcl6-dependent pathways maintain a CD4 T cell population with memory-like properties  
991 during tuberculosis. *Journal of Experimental Medicine* [Internet]. 2015 Apr  
992 27;212(5):715–28. Available from: <https://doi.org/10.1084/jem.20141518>
- 993 45. Prezzemolo T, Guggino G, la Manna MP, di Liberto D di, Dieli F, Caccamo N. Functional  
994 signatures of human CD4 and CD8 T cell responses to *Mycobacterium tuberculosis*. Vol.  
995 5, *Frontiers in Immunology*. 2014.
- 996 46. Martin MD, Badovinac VP. Defining Memory CD8 T Cell. *Frontiers in Immunology*  
997 [Internet]. 2018;9:2692. Available from:  
998 <https://www.frontiersin.org/article/10.3389/fimmu.2018.02692>
- 999 47. du Bruyn E, Ruzive S, Lindestam Arlehamn CS, Sette A, Sher A, Barber DL, et al.  
1000 *Mycobacterium tuberculosis*-specific CD4 T cells expressing CD153 inversely associate  
1001 with bacterial load and disease severity in human tuberculosis. *Mucosal Immunology*  
1002 [Internet]. 2020; Available from: <https://doi.org/10.1038/s41385-020-0322-6>
- 1003 48. Marino S, Kirschner D. A Multi-Compartment Hybrid Computational Model Predicts Key  
1004 Roles for Dendritic Cells in Tuberculosis Infection. *Computation* [Internet]. 2016;4(4):39.  
1005 Available from: <http://www.mdpi.com/2079-3197/4/4/39>
- 1006 49. Coleman MT, Maiello P, Tomko J, Frye LJ, Fillmore D, Janssen C, et al. Early changes  
1007 by <sup>18</sup>F-fluorodeoxyglucose positron emission tomography coregistered with computed  
1008 tomography predict outcome after *Mycobacterium tuberculosis* infection in cynomolgus  
1009 macaques. *Infection and Immunity*. 2014;82(6):2400–4.
- 1010 50. Ganchua SKC, Cadena AM, Maiello P, Gideon HP, Myers AJ, Junecko BF, et al. Lymph  
1011 nodes are sites of prolonged bacterial persistence during *Mycobacterium tuberculosis*  
1012 infection in macaques. *PLOS Pathogens* [Internet]. 2018 Nov 1;14(11):e1007337-  
1013 Available from: <https://doi.org/10.1371/journal.ppat.1007337>
- 1014 51. Flynn JL, Chan J, Lin PL. Macrophages and control of granulomatous inflammation in  
1015 tuberculosis. *Mucosal immunology* [Internet]. 2011/03/23. 2011 May;4(3):271–8.  
1016 Available from: <https://pubmed.ncbi.nlm.nih.gov/21430653>
- 1017 52. Giacomini E, Iona E, Ferroni L, Miettinen M, Fattorini L, Orefici G, et al. Infection of  
1018 Human Macrophages and Dendritic Cells with *Mycobacterium*  
1019 *tuberculosis* Induces a Differential Cytokine Gene Expression That Modulates  
1020 T Cell Response. *The Journal of Immunology* [Internet]. 2001 Jun 15;166(12):7033.  
1021 Available from: <http://www.jimmunol.org/content/166/12/7033.abstract>
- 1022 53. Marino S, Pawar S, Fuller CL, Reinhart TA, Flynn JL, Kirschner DE. Dendritic Cell  
1023 Trafficking and Antigen Presentation in the Human Immune Response to *Mycobacterium*  
1024 *tuberculosis*. *The Journal of Immunology*. 2004;173(1):494–506.

- 1025 54. Allie N, Grivennikov SI, Keeton R, Hsu N-J, Bourigault M-L, Court N, et al. Prominent  
1026 role for T cell-derived Tumour Necrosis Factor for sustained control of Mycobacterium  
1027 tuberculosis infection. *Scientific Reports* [Internet]. 2013;3(1):1809. Available from:  
1028 <https://doi.org/10.1038/srep01809>
- 1029 55. Marino S, Kirschner DE. The human immune response to Mycobacterium tuberculosis in  
1030 lung and lymph node. *Journal of Theoretical Biology* [Internet]. 2004;227(4):463–86.  
1031 Available from: <https://www.sciencedirect.com/science/article/pii/S0022519303004429>
- 1032 56. Sallin MA, Kauffman KD, Riou C, du Bruyn E, Foreman TW, Sakai S, et al. Host  
1033 resistance to pulmonary Mycobacterium tuberculosis infection requires CD153  
1034 expression. *Nature Microbiology* [Internet]. 2018;3(11):1198–205. Available from:  
1035 <https://doi.org/10.1038/s41564-018-0231-6>
- 1036 57. Cohen SB, Urdahl KB. Going beyond gamma for TB protection. *Nature Microbiology*  
1037 [Internet]. 2018;3(11):1194–5. Available from: [https://doi.org/10.1038/s41564-018-0266-](https://doi.org/10.1038/s41564-018-0266-8)  
1038 8
- 1039 58. Sud D, Bigbee C, Flynn JL, Kirschner DE. Contribution of CD8+ T Cells to Control of  
1040 Mycobacterium tuberculosis Infection. *The Journal of Immunology*. 2014;176(7):4296–  
1041 314.
- 1042 59. Woodland DL, Kohlmeier JE. Migration, maintenance and recall of memory T cells in  
1043 peripheral tissues. *Nature Reviews Immunology* [Internet]. 2009;9(3):153–61. Available  
1044 from: <https://doi.org/10.1038/nri2496>
- 1045 60. Gong C, Linderman JJ, Kirschner D. Harnessing the heterogeneity of T cell differentiation  
1046 fate to fine-tune generation of effector and memory T cells. *Frontiers in Immunology*.  
1047 2014;5(FEB).
- 1048 61. Jacquez JA. *Compartmental analysis in biology and medicine*. 1972;
- 1049 62. Read MN, Alden K, Timmis J, Andrews PS. Strategies for calibrating models of biology.  
1050 *Briefings in Bioinformatics*. 2018;
- 1051 63. Joslyn LR, Kirschner DE, Linderman JJ. CaliPro: A Calibration Protocol That Utilizes  
1052 Parameter Density Estimation to Explore Parameter Space and Calibrate Complex  
1053 Biological Models. *Cellular and Molecular Bioengineering*. 2020;
- 1054 64. Cadena AM, Hopkins FF, Maiello P, Carey AF, Wong EA, Martin CJ, et al. Concurrent  
1055 infection with Mycobacterium tuberculosis confers robust protection against secondary  
1056 infection in macaques. *PLoS Pathogens*. 2018;14(10).
- 1057 65. Darrah PA, DiFazio RM, Maiello P, Gideon HP, Myers AJ, Rodgers MA, et al. Boosting  
1058 BCG with proteins or rAd5 does not enhance protection against tuberculosis in rhesus  
1059 macaques. *npj Vaccines*. 2019;4(1).
- 1060 66. Wessler T, Joslyn LR, Borish HJ, Gideon HP, Flynn JL, Kirschner DE, et al. A  
1061 computational model tracks whole-lung Mycobacterium tuberculosis infection and  
1062 predicts factors that inhibit dissemination. *bioRxiv* [Internet]. 2019 Jan 1;713701.  
1063 Available from: <http://biorxiv.org/content/early/2019/07/24/713701.abstract>
- 1064 67. Marino S, Hogue IB, Ray CJ, Kirschner DE. A methodology for performing global  
1065 uncertainty and sensitivity analysis in systems biology. Vol. 254, *Journal of Theoretical*  
1066 *Biology*. 2008. p. 178–96.
- 1067 68. Gideon HP, Hughes TK, Wadsworth MH, Tu AA, Gierahn TM, Hopkins FF, et al. Single-  
1068 cell profiling of tuberculosis lung granulomas reveals functional lymphocyte signatures of  
1069 bacterial control. *bioRxiv* [Internet]. 2020 Jan 1;2020.10.24.352492. Available from:  
1070 <http://biorxiv.org/content/early/2020/10/26/2020.10.24.352492.abstract>

- 1071 69. Scanga CA, Flynn JL. Modeling tuberculosis in nonhuman primates. *Cold Spring Harbor*  
1072 *Perspectives in Medicine*. 2014;4(12).
- 1073 70. Saltelli A, Aleksankina K, Becker W, Fennell P, Ferretti F, Holst N, et al. Why so many  
1074 published sensitivity analyses are false: A systematic review of sensitivity analysis  
1075 practices. *Environmental Modelling & Software* [Internet]. 2019;114:29–39. Available  
1076 from: <https://www.sciencedirect.com/science/article/pii/S1364815218302822>
- 1077 71. Renardy M, Hult C, Evans S, Linderman JJ, Kirschner DE. Global sensitivity analysis of  
1078 biological multiscale models. *Current Opinion in Biomedical Engineering* [Internet].  
1079 2019;11:109–16. Available from:  
1080 <https://www.sciencedirect.com/science/article/pii/S2468451119300479>
- 1081 72. Benjamini Y, Hochberg Y. Controlling the false discovery rate: a practical and powerful  
1082 approach to multiple testing. *Journal of the Royal statistical society: series B*  
1083 (Methodological). 1995;57(1):289–300.
- 1084 73. Cilfone NA, Ford CB, Marino S, Mattila JT, Gideon HP, Flynn JL, et  
1085 al. Computational Modeling Predicts IL-10 Control of Lesion Sterilization by  
1086 Balancing Early Host Immunity–Mediated Antimicrobial Responses with Caseation  
1087 during *Mycobacterium tuberculosis* Infection. *The Journal of*  
1088 *Immunology*. 2015;194(2):664–77.
- 1089 74. Lin PL, Flynn JL. CD8 T cells and *Mycobacterium tuberculosis* infection. *Seminars in*  
1090 *Immunopathology* [Internet]. 2015;37(3):239–49. Available from:  
1091 <http://link.springer.com/10.1007/s00281-015-0490-8>
- 1092 75. Fennelly KP, Jones-López EC. Quantity and Quality of Inhaled Dose Predicts  
1093 Immunopathology in Tuberculosis. *Frontiers in immunology* [Internet]. 2015 Jun  
1094 29;6:313. Available from: <https://pubmed.ncbi.nlm.nih.gov/26175730>
- 1095 76. Horsburgh CR, Rubin EJ. Latent Tuberculosis Infection in the United States. *New*  
1096 *England Journal of Medicine* [Internet]. 2011 Apr 13;364(15):1441–8. Available from:  
1097 <https://doi.org/10.1056/NEJMcp1005750>
- 1098 77. Koch R. The etiology of tuberculosis. *Mittheilungen aus dem Kaiserlichen*  
1099 *Gesundheitsamte*. 1884;2:1–88.
- 1100 78. Lenaerts A, Barry 3rd CE, Dartois V. Heterogeneity in tuberculosis pathology,  
1101 microenvironments and therapeutic responses. *Immunological reviews* [Internet]. 2015  
1102 Mar;264(1):288–307. Available from: <https://pubmed.ncbi.nlm.nih.gov/25703567>
- 1103 79. Subbian S, Tsenova L, Kim M-J, Wainwright HC, Visser A, Bandyopadhyay N, et al.  
1104 Lesion-Specific Immune Response in Granulomas of Patients with Pulmonary  
1105 Tuberculosis: A Pilot Study. *PloS one* [Internet]. 2015 Jul 2;10(7):e0132249–e0132249.  
1106 Available from: <https://pubmed.ncbi.nlm.nih.gov/26133981>
- 1107 80. Lieberman TD, Wilson D, Misra R, Xiong LL, Moodley P, Cohen T, et al. Genomic  
1108 diversity in autopsy samples reveals within-host dissemination of HIV-associated  
1109 *Mycobacterium tuberculosis*. *Nature medicine* [Internet]. 2016/10/31. 2016  
1110 Dec;22(12):1470–4. Available from: <https://pubmed.ncbi.nlm.nih.gov/27798613>
- 1111 81. Maiello P, DiFazio RM, Cadena AM, Rodgers MA, Lin PL, Scanga CA, et al. Rhesus  
1112 macaques are more susceptible to progressive tuberculosis than cynomolgus macaques: A  
1113 quantitative comparison. *Infection and Immunity*. 2018;86(2).
- 1114 82. Lin PL, Pawar S, Myers A, Pegu A, Fuhrman C, Reinhart TA, et al. Early events in  
1115 *Mycobacterium tuberculosis* infection in cynomolgus macaques. *Infection and Immunity*.  
1116 2006;

- 1117 83. Cicchese JM, Evans S, Hult C, Joslyn LR, Wessler T, Millar JA, et al. Dynamic balance  
1118 of pro- and anti-inflammatory signals controls disease and limits pathology.  
1119 *Immunological Reviews*. 2018;285(1):147–67.
- 1120 84. Björnsson B, Borrebaeck C, Elander N, Gasslander T, Gawel DR, Gustafsson M, et al.  
1121 Digital twins to personalize medicine. *Genome Medicine* [Internet]. 2019;12(1):4.  
1122 Available from: <https://doi.org/10.1186/s13073-019-0701-3>
- 1123 85. Laubenbacher R, Sluka JP, Glazier JA. Using digital twins in viral infection. *Science*  
1124 [Internet]. 2021 Mar 12;371(6534):1105. Available from:  
1125 <http://science.sciencemag.org/content/371/6534/1105.abstract>
- 1126 86. MacLean E, Broger T, Yerlikaya S, Fernandez-Carballo BL, Pai M, Denking CM. A  
1127 systematic review of biomarkers to detect active tuberculosis. *Nature microbiology*.  
1128 2019;4(5):748–58.
- 1129 87. Goletti D, Lee M, Wang J, Walter N, Ottenhoff THM. Update on tuberculosis biomarkers:  
1130 from correlates of risk, to correlates of active disease and of cure from disease.  
1131 *Respirology*. 2018;23(5):455–66.
- 1132 88. Weiner 3rd J, Parida SK, Maertzdorf J, Black GF, Repsilber D, Telaar A, et al.  
1133 Biomarkers of inflammation, immunosuppression and stress with active disease are  
1134 revealed by metabolomic profiling of tuberculosis patients. *PloS one*. 2012;7(7):e40221.
- 1135 89. Wallis RS, Kim P, Cole S, Hanna D, Andrade BB, Maeurer M, et al. Tuberculosis  
1136 biomarkers discovery: developments, needs, and challenges. *The Lancet infectious*  
1137 *diseases*. 2013;13(4):362–72.
- 1138 90. Sutherland JS, Hill PC, Adetifa IM, de Jong BC, Donkor S, Joosten SA, et al.  
1139 Identification of probable early-onset biomarkers for tuberculosis disease progression.  
1140 *PloS one*. 2011;6(9):e25230.
- 1141 91. Sester U, Fousse M, Dirks J, Mack U, Prasse A, Singh M, et al. Whole-blood flow-  
1142 cytometric analysis of antigen-specific CD4 T-cell cytokine profiles distinguishes active  
1143 tuberculosis from non-active states. *PloS one*. 2011;6(3):e17813.
- 1144 92. Whitworth HS, Aranday-Cortes E, Lalvani A. Biomarkers of tuberculosis: a research  
1145 roadmap. *Biomarkers in medicine*. 2013;7(3):349–62.
- 1146 93. Walzl G, Ronacher K, Hanekom W, Scriba TJ, Zumla A. Immunological biomarkers of  
1147 tuberculosis. *Nature Reviews Immunology*. 2011;11(5):343–54.
- 1148 94. Rossitto S, Spagnolo P. The timing from tuberculosis infection to cavitation. *Rassegna di*  
1149 *Patologia dell'Apparato Respiratorio*. 2020;35:29–37.
- 1150 95. Potter EL, Gideon HP, Tkachev V, Fabozzi G, Chassiakos A, Petrovas C, et al.  
1151 Measurement of leukocyte trafficking kinetics in macaques by serial intravascular  
1152 staining. *Science Translational Medicine* [Internet]. 2021 Jan 13;13(576):eabb4582.  
1153 Available from: <http://stm.sciencemag.org/content/13/576/eabb4582.abstract>
- 1154 96. Gideon HP, Phuah J, Junecko BA, Mattila JT. Neutrophils express pro- and anti-  
1155 inflammatory cytokines in granulomas from Mycobacterium tuberculosis-infected  
1156 cynomolgus macaques. *Mucosal Immunology* [Internet]. 2019;12(6):1370–81. Available  
1157 from: <https://doi.org/10.1038/s41385-019-0195-8>
- 1158 97. Thacker V v, Dhar N, Sharma K, Barrile R, Karalis K, McKinney JD. A lung-on-chip  
1159 model of early Mycobacterium tuberculosis infection reveals an essential role for alveolar  
1160 epithelial cells in controlling bacterial growth. *Stallings CL, Garrett WS, Shiloh MU,*  
1161 *editors. eLife* [Internet]. 2020;9:e59961. Available from:  
1162 <https://doi.org/10.7554/eLife.59961>

- 1163 98. Liu CH, Liu H, Ge B. Innate immunity in tuberculosis: host defense vs pathogen evasion.  
1164 Cellular & Molecular Immunology [Internet]. 2017;14(12):963–75. Available from:  
1165 <https://doi.org/10.1038/cmi.2017.88>
- 1166 99. Kaufmann E, Sanz J, Dunn JL, Khan N, Mendonça LE, Pacis A, et al. BCG Educates  
1167 Hematopoietic Stem Cells to Generate Protective Innate Immunity against Tuberculosis.  
1168 Cell [Internet]. 2018;172(1):176-190.e19. Available from:  
1169 <https://www.sciencedirect.com/science/article/pii/S0092867417315118>
- 1170 100. Bickett TE, McLean J, Creissen E, Izzo L, Hagan C, Izzo AJ, et al. Characterizing the  
1171 BCG Induced Macrophage and Neutrophil Mechanisms for Defense Against  
1172 Mycobacterium tuberculosis. Frontiers in Immunology [Internet]. 2020;11:1202.  
1173 Available from: <https://www.frontiersin.org/article/10.3389/fimmu.2020.01202>
- 1174 101. Lee JY. Diagnosis and treatment of extrapulmonary tuberculosis. Tuberculosis and  
1175 respiratory diseases [Internet]. 2015/04/02. 2015 Apr;78(2):47–55. Available from:  
1176 <https://pubmed.ncbi.nlm.nih.gov/25861336>
- 1177 102. Cardona P-J. The key role of exudative lesions and their encapsulation: lessons learned  
1178 from the pathology of human pulmonary tuberculosis. Frontiers in microbiology  
1179 [Internet]. 2015 Jun 16;6:612. Available from: <https://pubmed.ncbi.nlm.nih.gov/26136741>
- 1180 103. Hult C, Mattila JT, Gideon HP, Linderman JJ, Kirschner DE. Neutrophil Dynamics Affect  
1181 Mycobacterium tuberculosis Granuloma Outcomes and Dissemination. Frontiers in  
1182 immunology [Internet]. 2021 Oct 5;12:712457. Available from:  
1183 <https://pubmed.ncbi.nlm.nih.gov/34675916>
- 1184 104. Evans S, Butler JR, Mattila JT, Kirschner DE. Systems biology predicts that fibrosis in  
1185 tuberculous granulomas may arise through macrophage-to-myofibroblast transformation.  
1186 PLOS Computational Biology [Internet]. 2021 Dec 28;16(12):e1008520-. Available from:  
1187 <https://doi.org/10.1371/journal.pcbi.1008520>
- 1188 105. Rockwood N, du Bruyn E, Morris T, Wilkinson RJ. Assessment of treatment response in  
1189 tuberculosis. Expert review of respiratory medicine [Internet]. 2016/03/31. 2016  
1190 Jun;10(6):643–54. Available from: <https://pubmed.ncbi.nlm.nih.gov/27030924>  
1191
